# 1 Relationships between pond water and tilapia skin microbiomes in 2 aquaculture ponds in Malawi

3  
4 Jamie McMurtrie<sup>1,2#\*</sup>, Shayma Alathari<sup>1,2\*</sup>, Dominique L. Chaput<sup>1</sup>, David Bass<sup>2,3,4</sup>, Camerson  
5 Ghambi<sup>5</sup>, Joseph Nagoli<sup>6</sup>, Jérôme Delamare-Deboutteville<sup>7</sup>, Chadag Vishnumurthy Mohan<sup>7</sup>,  
6 Joanne Cable<sup>8</sup>, Ben Temperton<sup>1</sup>, Charles R. Tyler<sup>1,2</sup>

7  
8 <sup>1</sup> Biosciences, Geoffrey Pope Building, University of Exeter, Exeter, Devon EX4 4HB, UK

9 <sup>2</sup> Sustainable Aquaculture Futures, University of Exeter, Exeter, Devon EX4 4QD, UK

10 <sup>3</sup> Centre for Environment, Fisheries and Aquaculture Science (CEFAS), Weymouth

11 Laboratory, Weymouth, Dorset DT4 8UB, UK

12 <sup>4</sup> Department of Life Sciences, The Natural History Museum, Cromwell Rd, London, SW7

13 5BD, UK

14 <sup>5</sup> Department of Aquaculture and Fisheries Science, Lilongwe University of Agriculture and  
15 Natural Resources (LUANAR), P.O. Box 219, Lilongwe, Malawi

16 <sup>6</sup> WorldFish Malawi, Lilongwe, P.O. Box 30294, Malawi

17 <sup>7</sup> WorldFish, Bayan Lepas, Penang, Malaysia

18 <sup>8</sup> School of Biosciences, Cardiff University, Cardiff, CF10 3AX

19  
20 # Correspondence: (JM) [jm1106@exeter.ac.uk](mailto:jm1106@exeter.ac.uk) +44-(0)-1392-724677

21 \* JM and SA listed as co-first authors

## 22 23 Highlights

- 24 • Fish skin and pond water communities differ structurally, but share common taxa
- 25 • Pond locations have a stronger influence on water *versus* fish skin microbiome community  
26 structure
- 27 • Selected skin-associated taxa could be used to monitor dysbiotic events in aquaculture
- 28 • Taxa with opportunistic pathogen potential were identified at low abundance

## 29 Abstract

30 Intensification of fish farming practices is being driven by the demand for increased food  
31 production to support a rapidly growing global human population, particularly in lower-middle  
32 income countries. Intensification of production, however, increases the risk of disease  
33 outbreaks and thus the likelihood for crop losses. The microbial communities that colonise the  
34 skin mucosal surface of fish are poorly understood, but are important in maintaining fish health  
35 and resistance against disease. This skin microbial community is susceptible to disruption  
36 through stressors associated with transport, handling and the environment of intensive  
37 practices, and this risks the propagation of disease-causing pathogens. In this study, we  
38 characterised the microbial assemblages found on tilapia skin — the most widely farmed finfish  
39 globally — and in the surrounding water of seven earthen aquaculture ponds from two pond  
40 systems in distinct geographic regions in Malawi. Metabarcoding approaches were used to  
41 sequence the prokaryotic and microeukaryotic communities. We found 92% of prokaryotic  
42 amplicon sequence variants were common to both skin and water samples. Differentially  
43 enriched and core taxa, however, differed between the skin and water samples. In tilapia skin,  
44 *Cetobacterium*, *Paucibacter*, *Pseudomonas* and Comamonadaceae were enriched, whereas, the  
45 cyanobacteria *Cyanobium*, *Microcystis* and/or *Synechocystis*, and the diatom *Cyclotella*, were  
46 most prevalent in pond water. Ponds that clustered together according to their water prokaryotic  
47 communities also had similar microeukaryotic communities indicating strong environmental  
48 influences on prokaryotic and microeukaryotic community structures. While strong site-  
49 specific clustering was observed in pond water, the grouping of tilapia skin prokaryotes by

50 pond site was less distinct, suggesting fish microbiota have a greater buffering capacity against  
51 environmental influences. The characterised diversity, structure and variance of microbial  
52 communities associated with tilapia culture in Malawi provide the baseline for studies on how  
53 future intensification practices may lead to microbial dysbiosis and disease onset.

54

55 **Keywords**

56 Aquaculture, skin microbiome, tilapia, pond, bacterial community, eukaryotic community

57

## 58 **1. Introduction**

59 Capture fisheries will not be able to satisfy the demand for seafood products from an ever-  
60 increasing human population with rising living standards (Henchion et al., 2017) combined  
61 with plateauing, and in some cases declining, wild fish stocks due to overfishing and ecosystem  
62 degradation (Link and Watson, 2019). Seeking to meet this demand for aquatic products, many  
63 aquaculture farming practices are undergoing intensification. Shifting from extensive to  
64 intensive and semi-intensive practices in aquaculture, however, is often associated with  
65 increased incidence of infectious disease (Hinchliffe et al., 2020; Pulkkinen et al., 2010).  
66 Intensification can cause chronic stress that adversely impacts fish physiology resulting in  
67 reduced growth and impaired disease resilience. Increasing pond stocking rates and levels often  
68 occurs with insufficient amounts of clean water, leading to the deterioration of water quality,  
69 including dissolved oxygen, pH and ammonia (Abdel-Tawwab et al., 2014; Sundh et al., 2019),  
70 which in turn impacts negatively on fish growth and health, and renders the fish more  
71 susceptible to diseases. Regular restocking of ponds with fish of uncertain health status to  
72 compensate for mortalities, in turn, increases the likelihood of repeated introductions of sub-  
73 clinical infections (Bondad-Reantaso et al., 2005; Murray and Peeler, 2005).

74 Disease remains a huge challenge for aquaculture, particularly in Asia where 89% of  
75 global aquaculture production occurs (FAO, 2020c). Successful management of disease risk  
76 and intensification of aquatic species production requires a better understanding of the  
77 relationships between the microbial systems (microbiomes) of both the cultured aquaculture  
78 species and of the environments in which they are grown (Bass et al., 2019). The study of  
79 microbiomes in aquaculture is gaining momentum and recent studies have investigated how  
80 pond and fish treatments (e.g. antibiotics, dietary supplements, probiotic treatments and pond  
81 fertilisers) affect fish microbiomes (Limbu et al., 2018; Minich et al., 2018; Suphoronski et al.,  
82 2019; Tan et al., 2019). Much of this research has focused on the gut microbiome due to its  
83 intricate role in gut health, which when optimised can maximise feed conversion, growth, and  
84 overall aquaculture productivity (Perry et al., 2020). When considering disease resistance  
85 and/or susceptibility in fish aquaculture, however, arguably the microbial communities  
86 harboured on/in the skin and gills are likely to be equally if not more important.

87 These outer facing mucosal surfaces are in continuous contact with the aquatic  
88 environment and provide a primary barrier against invading pathogens (Legrand et al., 2018;  
89 Rosado et al., 2019b). The microbes colonising this skin niche include those specifically  
90 adapted to the host mucosal surface, as evidenced by host-species specificity of microbiome  
91 composition (Doane et al., 2020), but also microbes derived from the surrounding water  
92 community (Krotman et al., 2020). Relatively little is known about the environmental and host  
93 contributions to these microbial assemblages, particularly in aquaculture ponds. It is known,  
94 however, that skin colonisers have a direct connection with the host immune system helping to  
95 shape its function and responses (Kanther et al., 2014). Equally, the immune system provides  
96 feedback in sculpting the microbial community structure (Kelly and Salinas, 2017; Tarnecki et  
97 al., 2019). If these finely balanced communities are disrupted, to a state known as dysbiosis,  
98 resulting health complications and disease may occur. The fish skin microbiome has been  
99 reported to change following stressful events, such as high stocking densities and hypoxia

100 (Boutin et al., 2013), in fish showing clinical signs of gastrointestinal enteritis (Legrand et al.,  
101 2018) and also following viral infection (by salmonid alphavirus; see Reid et al., 2017),  
102 bacterial infection (by *Photobacterium damsela*; see Rosado, Xavier, et al., 2019b) and  
103 macroparasitism (by the sea lice *Lepeophtheirus salmonis*; see Llewellyn et al., 2017). In all  
104 of these cases, there was a decrease in abundance of reputedly beneficial taxa, concurrent with  
105 an increase in opportunistic pathogens. The resulting theory is that dysbiosis within the skin  
106 microbiome causes fish to become more susceptible to secondary bacterial infections. This has  
107 been shown for exposure to the antimicrobials rifampicin in *Gambusia affinis* Baird & Girard  
108 (Carlson et al., 2015) and potassium permanganate (Mohammed and Arias, 2015) in *Ictalurus*  
109 *punctatus* Rafinesque, where increased mortality occurred for dysbiotic fish compared with  
110 controls when challenged with the disease-causing *Edwardsiella ictaluri* and *Flavobacterium*  
111 *columnare*, respectively.

112 A limitation in the majority of microbiome studies, regardless of host species, is a focus  
113 on the bacterial community only with little or no attention given to the remaining microbial  
114 community members. This includes microeukaryotes, a taxonomic group that encompasses  
115 protists, microfungi, microalgae, and microbial metazoans (Bass and del Campo, 2020; del  
116 Campo et al., 2019), as well as viruses that infect an expansive host range including  
117 microeukaryotes, bacteria and the animal host (Gadoin et al., 2021). Microeukaryotic  
118 communities are well described in some settings, such as the contribution of microalgae to  
119 primary production in the ocean (Benoiston et al., 2017). The relationships between  
120 microeukaryotes and animal hosts have predominantly focussed on parasitism and  
121 pathogenesis, yet microeukaryotes play an intricate role in the broader microbial community  
122 of host-associated niches. One of the best described examples is *Blastocystis*, a protist  
123 commonly found to colonise the gut of humans and other animal hosts. Its presence is thought  
124 to correlate with protection against several gastrointestinal inflammatory diseases by  
125 interacting with the bacterial community to promote a healthy microbiome (Laforest-Lapointe  
126 and Arrieta, 2018), specifically via an associated increase in bacterial diversity and strong co-  
127 occurrence patterns with reputed beneficial bacteria (Audebert et al., 2016; Beghini et al.,  
128 2017). The full role *Blastocystis* plays in human health remains unresolved and controversial.  
129 The extent of interactions occurring between bacteria and microeukaryotes and/or viruses in  
130 the fish skin microbiome is largely unknown and unreported.

131 Tilapia are the most widely farmed finfish in global aquaculture, produced in over 170  
132 countries. Numerous species of tilapia are farmed, dominated by Nile tilapia (*Oreochromis*  
133 *niloticus* L.), and predominantly in lower-middle income countries (LMICs) across the  
134 Southeast Asian, African and South American continents (FAO, 2020b). Given their fast  
135 growth, adaptability to a variety of environmental culture conditions, and resilience against  
136 both disease and poor water quality, tilapia are now a production staple for many LMICs, and  
137 colloquially is often referred to as the aquatic chicken (FAO, 2020a). While some aquaculture  
138 species grown in LMICs, such as shrimp, are high-value products for export, the bulk of tilapia  
139 production is for domestic markets. As a consequence, fewer regulations exist for tilapia  
140 production (El-Sayed, 2019) and there has been far less scientific research for optimising  
141 sustainable production compared to some other high-value teleost species, such as Atlantic  
142 salmon.

143 Aquaculture in Malawi is in its relative infancy compared with other countries in Africa  
144 and Asia. Nevertheless, production has seen on average a 24% yearly growth between 2006  
145 and 2016 (CASA, 2020). The levels of intensification or disease incidence seen in Malawi are  
146 low compared with Asia, but as demand increases, disease levels will inevitably increase also.  
147 Tilapia species cultured in Malawi include *Coptodon rendalli* Boulenger and *Oreochromis*  
148 *shiranus* Boulenger, with the notable absence of Nile tilapia, which is considered an invasive  
149 species. To fully elucidate the influence of microbiomes on fish health during disease

150 processes, we need to better understand the relationships between the microbial diversity,  
 151 community variance and structure in the mucosal surfaces of fish and those in the aquatic  
 152 environment, including microeukaryotes (often excluded from microbiome studies), for  
 153 disease-free populations. In this study therefore, we applied high throughput DNA sequencing  
 154 for metabarcoding of the 16S and 18S ribosomal RNA (rRNA) small subunit (SSU) marker  
 155 genes (which are conserved within prokaryotes and eukaryotes, respectively), to characterise  
 156 the microbial communities of pond water and tilapia skin (*C. rendalli* and *O. shiranus*) from  
 157 earthen aquaculture ponds in Malawi. With these data, we investigated the relationships  
 158 between the pond water and skin microbiome. We identified differentially enriched and core  
 159 taxa within the tilapia skin microbiome that are likely to play an important biological role for  
 160 the host and may provide notable taxa for future studies to interpret disease events.  
 161

## 162 2. Materials and methods

### 163 2.1. Sample collection

164 Seven tilapia aquaculture earthen ponds were sampled in October 2017 from two pond systems  
 165 in Malawi. Two ponds from a commercial farm were located in Maldeco, and a five ponds  
 166 from a community pond syndicate were located 200 km further south in Blantyre  
 167 (Supplementary Fig. 1). Two sample types were collected: pond water and tilapia skin swabs  
 168 (Table 1). Pond surface water was collected from five locations within each pond by passing  
 169 200 mL of water through a polycarbonate filter (0.4 µm pore, 47 mm diameter, Whatman). The  
 170 volumes of water filtered were affected by the amount of organic/particulate matter in the  
 171 samples such that volumes were sampled until filters became saturated and prevented further  
 172 filtration. Mucosal skin samples of tilapia flanks (*C. rendalli* and *O. shiranus*) were collected  
 173 by swabbing three times along the entire length of the lateral line (Delamare-Deboutteville et  
 174 al., 2021) with sterile polyester swabs (Texwipe). Filters were preserved in 1.8 ml of 100%  
 175 molecular grade ethanol (FisherScientific), while swabs were preserved in 1.8 ml of RNA*later*  
 176 (Qiagen), and stored at ambient temperature until transferred to the UK for prolonged storage  
 177 at -20 °C, until used for DNA extraction and sequencing.  
 178

179 **Table 1.** Details of pond sites and samples for the pond water and fish skin swabs obtained  
 180 from Malawian tilapia aquaculture ponds.

| Pond system location | Pond site | No. pond water samples | No. fish skin swabs * | Cultured species                                          | Mean fish length (mm) ± SD | No. fish measured for length |
|----------------------|-----------|------------------------|-----------------------|-----------------------------------------------------------|----------------------------|------------------------------|
| Blantyre, Malawi     | 1         | 5                      | 2                     | <i>Coptodon rendalli</i>                                  | 115 ± 11.8                 | 5                            |
| Blantyre, Malawi     | 2         | 5                      | 1                     | <i>Coptodon rendalli</i>                                  | 125 ± 19.1                 | 5                            |
| Blantyre, Malawi     | 3         | 5                      | 7 (5)                 | <i>Coptodon rendalli</i> ,<br><i>Clarias gariepinus</i>   | 149 ± 9.3<br>N/A           | 8                            |
| Blantyre, Malawi     | 4         | 5                      | 8                     | <i>Coptodon rendalli</i> ,<br><i>Oreochromis shiranus</i> | 137 ± 4.2<br>122 ± 6.6     | 5<br>3                       |
| Blantyre, Malawi     | 5         | 5                      | 5                     | <i>Coptodon rendalli</i>                                  | 162 ± 18                   | 5                            |

|                            |          |           |                |                                 |            |   |
|----------------------------|----------|-----------|----------------|---------------------------------|------------|---|
| <b>Maldeco,<br/>Malawi</b> | 6        | 5         | 6 (4)          | <i>Oreochromis<br/>shiranus</i> | 222 ± 30.5 | 5 |
| <b>Maldeco,<br/>Malawi</b> | 7        | 5         | 4 (3)          | <i>Oreochromis<br/>shiranus</i> | 212 ± 12.7 | 5 |
| <b>Total</b>               | <b>7</b> | <b>35</b> | <b>33 (28)</b> |                                 |            |   |

181 \*Numbers in parentheses refer to the number of 18S rRNA samples successfully sequenced,  
182 where this differs from 16S rRNA samples.

183

## 184 2.2. DNA extraction

185 Ethanol was removed from pond water filters by freeze-drying (ScanVac CoolSafe Pro, 4 L  
186 condenser at -110 °C) and filters were then stored at -80 °C. RNA<sup>later</sup> was removed from fish  
187 swab samples by vortexing the swabs for 30 seconds in 23 mL of 1x sterile phosphate buffered  
188 saline (Sigma) to allow detachment of microbes. The swab and solution were transferred to a  
189 syringe for filtration with a 0.22 µm Sterivex (Millipore) filter unit. Following ethanol and  
190 RNA<sup>later</sup> removal from filters and swabs, DNA was extracted with a  
191 CTAB/EDTA/chloroform method adapted from Bramwell et al. (1995) and Lever et al. (2015),  
192 and is available in full at (<https://dx.doi.org/10.17504/protocols.io.bw8gphtw>).

193 Briefly, for DNA extraction, filters were first suspended in 570 µl lysis buffer (30 mM  
194 Tris, 30 mM EDTA, pH 8, FisherScientific), freeze-thaw lysed in liquid nitrogen and  
195 homogenised by bead-beating with Lysing Matrix A Bulk Beads (Garnet) on the Qiagen  
196 TissueLyser II for 40 seconds at 30 Hz. The sample suspension was digested with 1 µL Ready-  
197 Lyse lysozyme (1000 U/ µL, Epicentre), and 3 µL proteinase K (20 mg/mL, Sigma) in 30 µL  
198 SDS (10% w/v, FisherScientific) for 1 hour at 55 °C. Samples were then incubated for 10  
199 minutes at 65 °C in 120 µL NaCl (5 mM, Sigma) and CTAB solution  
200 (hexadecyltrimethylammonium bromide, 96 µL, 10% w/v, Sigma). An equal ratio of sample  
201 and 24:1 chloroform:isoamyl alcohol (Acros Organics) were used for extractions, with  
202 centrifugation at 14,000 x g, 4 °C for 5 minutes. The aqueous layer was retained for a second  
203 extraction, after which 1 µL of linear polyacrylamide solution (GenElute LPA, Sigma) was  
204 added to aid precipitation with 0.7 volumes isopropanol (Acros Organics). Following overnight  
205 incubation at 4 °C, samples were centrifuged at 21,000 x g, 4 °C for 30 minutes and the  
206 resulting pellet was washed with 70% ethanol (FisherScientific). After 10 minutes of  
207 centrifugation at 21,000 x g and pipetting off the ethanol, DNA pellets were resuspended in TE  
208 buffer (10 mM Tris-HCl, 1 mM EDTA, pH 8, Sigma) and stored at -20 °C until used for  
209 sequencing.

210

## 211 2.3. Metabarcoding

212 Metabarcoding of prokaryotic and microeukaryotic SSU rRNA marker genes was performed  
213 by PCR amplification with the Earth Microbiome Project recommended primers. The 16S  
214 rRNA V4 hypervariable region was targeted by 515F (Parada) 5'-  
215 GTGYCAGCMGCCGCGGTAA-3' (Parada et al., 2016); 806R (Apprill)  
216 GGACTACNVGGGTWTCTAAT (Apprill et al., 2015), and the 18S rRNA V9 hypervariable  
217 region was targeted by 1391f 5'-GTACACACCGCCCGTC-3' (Lane, 1991) and EukBr 5'-  
218 TGATCCTTCTGCAGGTTACCTAC-3' (Medlin et al., 1988). Amplification conditions for  
219 16S V4 were 98 °C for 30 seconds; 30 cycles of 98 °C for 10 seconds, 55 °C for 30 seconds,  
220 72 °C for 30 seconds; and a final extension of 72 °C for 2 minutes. 18S V9 conditions were the  
221 same, with the exception of an annealing temperature of 60 °C. Samples were amplified and  
222 multiplexed in a 1-step PCR with a dual-indexing scheme (Kozich et al., 2013). Individual  
223 samples were run as 50 µL reactions with 2 ng starting DNA, 25 µL NEBNext High-Fidelity  
224 PCR Master Mix (New England Biolabs), 0.5 µM forward and reverse primers, prior to pooling

225 and sequencing by the University of Exeter Sequencing Service on the Illumina MiSeq, using  
226 v2 chemistry (250 bp paired-end for 16S and 150 bp paired-end for 18S). The sequencing runs  
227 included four positive controls (ZymoBIOMICS® Microbial Community DNA standard, lot  
228 number ZRC190811) and six negative controls comprising nuclease free water carried through  
229 the entire DNA extraction and PCR amplification.

230

#### 231 **2.4. Bioinformatics processing**

232 All bioinformatics and statistical analyses were performed in R v3.6.3. Following sample  
233 demultiplexing, reads were quality controlled and processed by the DADA2 pipeline v1.14  
234 (Callahan et al., 2016). Briefly, quality profiles of paired reads were inspected and forward and  
235 reverse reads were truncated at 200 bp and 160 bp, respectively, for prokaryotes, and 100 bp  
236 for both reads of microeukaryotes. Amplicon sequence variants (ASVs) were then inferred with  
237 DADA2's pooling method to enhance the detection of rare ASVs. Paired reads were merged if  
238 they achieved a minimum overlap of 100 bp for prokaryotes and 25 bp for microeukaryotes.  
239 To remove off-target sequencing artefacts, final ASVs were only retained for the lengths 250  
240 – 256 bp for prokaryotes and 90 – 150 bp for microeukaryotes. Chimeras were removed and  
241 taxonomy assigned to each ASV against the SILVA SSU v138 taxonomic database (Quast et  
242 al., 2012). For the microeukaryotic dataset, only ASVs classified by SILVA as eukaryotic were  
243 retained and final taxonomic classifications of these ASVs were made by the PR2 v4.12  
244 taxonomic database (Guillou et al., 2012). Accuracy of the taxonomic assignment was assessed  
245 in positive controls, with all members of the ZYMO mock community present, as expected  
246 (Supplementary Fig. 2).

247 A phylogenetic tree of ASVs was constructed with Phangorn v2.5.5 (Schliep, 2010) by  
248 first generating a neighbour-joining tree, followed by fitting a generalised time reversible  
249 substitution model to generate a maximum likelihood tree. The statistical tool Decontam v1.6  
250 (Davis et al., 2018) was used to identify contaminating ASVs by looking at the prevalence in  
251 negative controls, with standard parameters barring a 0.5 prevalence threshold. Thus, all  
252 sequences found at greater prevalence in negative controls than positive samples were classed  
253 as contaminants and were removed from the ASV table.

254 ASVs and sample data were parsed to Phyloseq v1.30 (McMurdie and Holmes, 2013)  
255 for all subsequent quality control and data analyses. To remove sequencing noise, only ASVs  
256 that reached a 2% prevalence threshold across samples were retained. Furthermore, any ASVs  
257 taxonomically assigned as chloroplasts, mitochondria, eukaryotic or unclassified at kingdom  
258 level were removed from the prokaryotic dataset. Additionally, for the microeukaryotic dataset,  
259 14 sequences classified as Craniata were removed, as these most likely represented fish  
260 sequences. As a result, the characterisation of fish skin microeukaryotes was limited due to the  
261 high levels of contaminating host 18S rRNA sequences (98.6%) in swab samples.

262

#### 263 **2.5. Statistical and data analysis**

264 Alpha diversity metrics were calculated with Phyloseq on counts rarefied to the minimum  
265 sequencing depth. The difference between pond sites was statistically tested by Welch's  
266 ANOVA and *post-hoc* pair-wise Games-Howell test, following confirmation of normality.  
267 Further testing between sample types utilised lmerTest v3.1-3 (Kuznetsova et al., 2017) to  
268 perform a linear mixed-effects model that accounted for pond site as a random effect. A  
269 Pearson's correlation coefficient was used to test for correlation of Chao1 richness and  
270 Shannon diversity between sample types.

271 Beta diversity analysis was performed with compositional data analysis principles.  
272 These comprise log-based transformations, which cannot be performed on zero values.  
273 Therefore, ASV counts were subjected to a count zero multiplicative replacement method in  
274 zCompositions v1.3.4 (Palarea-Albaladejo and Martín-Fernández, 2015). A centred log-ratio

275 (CLR) transformation was then applied to ASV counts with the CoDaSeq package v0.99.6  
276 (<https://github.com/ggloor/CoDaSeq>). Euclidean distance was calculated on log-ratios and  
277 ordinated by PCoA biplot with FactoExtra v1.0.7 (<https://github.com/kassambara/factoextra>).  
278 Statistical differences between pond site and sample type groups were conducted on the  
279 Euclidean distance matrix by permutational multivariate analysis of variance (PERMANOVA)  
280 and permutation tests for homogeneity of multivariate dispersions, implemented in Vegan  
281 v2.5-6 (Dixon, 2003).

282 Community composition was presented as heat trees of taxon relative abundance with  
283 Metacoder v0.3.4 (Foster et al., 2017), utilising a Davidson-Harel layout algorithm. Differential  
284 abundance between sample types was assessed by CornCob v0.1 (Martin et al., 2020), utilising  
285 the Wald Chi-Squared test and accounting for pond site as a random effect. Core microbiome  
286 analysis was performed on ASVs amalgamated to genus level and rarefied to the minimum  
287 sequencing depth. Classification of the fish skin core genera was performed with the  
288 Microbiome package v2.1 (Lahti and Shetty, 2017) based on a prevalence threshold of 80%  
289 and a detection threshold of 0.01% in all swab samples. Heatmaps of core genera and  
290 discriminant taxa were depicted as heatmaps of CLR abundance of non-rarefied counts by  
291 pheatmap v1.0.12 (<https://github.com/raivokolde/pheatmap>).

292 The significance level and false discovery rate of 0.05 was set for all statistical analyses.  
293

## 294 **2.6. Data availability**

295 Raw sequencing reads were deposited in the European Nucleotide Archive under the accession  
296 PRJEB46984. Data processing, analysis scripts and final ASV tables are accessible at  
297 [https://github.com/jamiemcm/Malawi\\_Tilapia\\_Microbiomes](https://github.com/jamiemcm/Malawi_Tilapia_Microbiomes).

298

## 299 **3. Results**

300 Following quality control and filtering, the final prokaryotic dataset contained 969,562 reads  
301 and 5782 ASVs from all skin swab and pond water filter samples, respectively, collected in  
302 this study (67 samples). The eukaryotic dataset comprised 94,611 reads, 1659 ASVs from the  
303 62 samples collected. Full read counts per library, including break down between skin swabs  
304 and pond water filters, are available in Supplementary Table 1.

305

### 306 **3.1. Phytoplankton communities**

307 Compositional approaches (CLR) to beta diversity were applied to explore variation in  
308 microbial community composition and abundance of pond water between sites are shown in  
309 Figures 1A and 1B. Clear clustering of water samples by pond site was evident, with the  
310 position of mean group centroids corresponding to site shown to be significantly different from  
311 each other according to PERMANOVA for both prokaryotic ( $F(6,28) = 34.29$ ,  $R^2 = 0.88$ ,  $p <$   
312  $0.001$ ) and microeukaryotic ( $F(6,28) = 15.12$ ,  $R^2 = 0.76$ ,  $p < 0.001$ ) communities. Dispersion of  
313 the pond water samples collected within each site was relatively small, particularly with respect  
314 to prokaryotes (Fig. 1B). However, largely due to pond site 2, dispersion in prokaryotes  
315 differed significantly according to permutation tests for homogeneity of multivariate  
316 dispersions (Prokaryotes  $F(6,28) = 3.95$ ,  $p = 0.003$ ; Eukaryotes  $F(6,28) = 0.87$ ,  $p = 0.53$ ).

317 While pond location had a strong influence on the separation of pond water samples,  
318 the clustering observed in prokaryotes of the tilapia skin was less distinctive (Fig. 1C). There  
319 was a significant difference between the mean centroid position of each pond site by  
320 PERMANOVA ( $F(6,25) = 4.19$ ,  $R^2 = 0.50$ ,  $p < 0.001$ ) and significant dispersion between fish  
321 within the same pond ( $F(6,25) = 5.32$ ,  $p = 0.009$ ).

322 Specific taxa were associated with driving community separation between pond sites.  
323 Figure 1 shows the top 15 contributing taxa plotted as arrows on each biplot, with their CLR

324 abundance depicted in the accompanying heatmaps. In pond water, microeukaryotes included  
325 several diatoms (ASV6: *Cyclotella* and ASV16: *Aulacoseira*), the presence of which separated  
326 pond site clusters 2,3 and 6,7 from 1,4,5. ASV47: Eukaryota was the major taxon - found at  
327 high abundance - discriminating pond site cluster 1,4,5 from the remaining ponds, and a  
328 BLASTn search of this ASV revealed 90% similarity to the microalgae *Cryptomonas*. In the  
329 pond water prokaryotic community, photosynthetic Cyanobacteria were particularly prevalent  
330 in pond site clusters 2,3 and 6,7, with apparently differing *Cyanobium* ASVs (ASV3, ASV4)  
331 in each cluster, and a shared *Synechocystis* (ASV1). Pond site cluster 1,4,5 was distinguished  
332 by typical freshwater planktonic Proteobacteria (ASV9: *Polynucleobacter*, ASV111:  
333 *Limnohabitans* and ASV22: Comamonadaceae), among others. For fish skin prokaryotes, three  
334 out of the top 15 discriminant taxa (ASV43: *Aquabacterium*, and ASV16, ASV74:  
335 Comamonadaceae) explained the separation of pond cluster 1,4,5 only. Many of these  
336 identified taxa shared taxonomic affiliation to the aforementioned prokaryotes of pond water,  
337 but were represented by separate ASVs than those previously identified, such as ASV17,  
338 ASV24: *Cyanobium*, ASV16, ASV74: Comamonadaceae and ASV6, ASV73, ASV135:  
339 Actinobacteria *hgcl clade* (Warnecke et al., 2004).

340 Alpha diversity metrics gave an insight into species diversity of the pond water samples  
341 from different pond sites as determined through assessing community richness (Chao1) and  
342 evenness (Shannon diversity and Inverse Simpson diversity) (Fig. S3A,B). Applying Welch's  
343 ANOVA showed a significant difference between both prokaryotic and microeukaryotic  
344 communities of each pond site for all diversity metrics (Tab. S2). No correlation was found  
345 between prokaryotic and microeukaryotic communities for the mean richness/diversity metric  
346 of each pond site (Fig. S3D) (Pearson's correlation: Chao1 richness  $R = 0.56$ ,  $p = 0.19$ ; Shannon  
347 diversity  $R = 0.35$ ,  $p = 0.44$ ; InvSimpson  $R = -0.024$ ,  $p = 0.96$ ).

348

### 349 3.2. Microbial niche separation

350 We used measures of alpha and beta diversity to explore the influence of the environment (pond  
351 water) in shaping tilapia skin prokaryotic microbiota. When controlling for pond site as a  
352 random effect in linear mixed-effects modelling, ASV richness of the fish skin was found to  
353 be significantly lower than pond water (by  $503 \pm 59.49$  ASVs,  $R^2c = 0.61$ ,  $p < 0.001$ ) (Fig. 2A).  
354 Shannon diversity of fish skin and pond water varied according to pond site, however, there  
355 was no overall clear separation between the sample types when the aforementioned statistical  
356 model was applied (pond water  $4.96 \pm 0.12$ , fish skin  $4.72 \pm 0.15$ ,  $R^2c = 0.11$ ,  $p = 0.115$ ) (Fig.  
357 2B). Additionally, neither richness nor diversity were correlated between the fish skin and pond  
358 water when comparing between pond sites, according to Pearson correlation tests (Chao1  
359 richness  $R = 0.18$ ,  $p = 0.71$ ; Shannon diversity  $R = 0.11$ ,  $p = 0.81$ ) (Fig. 2C,D). Pair-wise  
360 comparisons were made of the beta diversity (Aitchison distance) between samples within each  
361 pond site (Fig. 2E) and this showed pond water samples clustered closely together, but greater  
362 dispersion was apparent between fish skin samples. The largest Aitchison distance values were  
363 seen in the comparisons between pond water and fish skin samples, indicating different  
364 prokaryotic community structures between these niches. Although these structures were made  
365 up of shared taxa, albeit at different abundances, with 4020 of a total 5782 ASVs detected in  
366 both pond water and fish skin (Fig. 2F).

367 Depicting taxonomic composition of prokaryotic and microeukaryotic communities  
368 from skin swab and pond water samples as phylogenetic heat trees (see Fig. S4) illustrates  
369 much of the diversity for individual samples is accounted for by rare taxa found at low  
370 abundance. The prokaryotic community composition at coarse taxonomic levels was overall  
371 very similar between the pond water and skin environments, although divergence emerges at  
372 finer taxonomic resolution. For the microeukaryotic community, a far greater overall  
373 taxonomic diversity was observed in pond water than on skin, with numerous rare taxa.



374 However, skin diversity was artificially under-sampled due to the over-amplification of tilapia  
375 host 18S RNA gene copies.

376 Taxonomic relative abundance (depicted as dot plots of prokaryotes at class level and  
377 microeukaryotes at division level) highlights the differences between pond water and fish skin  
378 niches (Fig. 3). According to differential abundance statistical testing, the bacterial classes  
379 Gammaproteobacteria and Clostridia were enriched (FDR <0.05) in the fish skin. Pond water  
380 by contrast had enriched abundances of Cyanobacteria, Actinobacteria, Bacteroidia,  
381 Verrucomicrobiae, Planctomycetes, Kapabacteria and Chloroflexia. Differential abundance  
382 testing controlled for pond site as a random effect, however, the degree and consistency of  
383 enrichment did vary between pond sites.

384 Within these high level taxa, individual prokaryotic taxa were (FDR <0.05)  
385 differentially abundant between pond water and the skin (Fig. 4). In general, these taxa  
386 followed phylogenetic trends of enrichment, whereby if a taxon was found to be differentially  
387 abundant, all other identified taxa within the same phylum were enriched in the same sample  
388 type. The pond water was differentially enriched with several taxa associated with key nutrient  
389 cycling processes in the aquatic environment, such as the photoautotrophs *Cyanobium*,  
390 *Synechocystis* and *Microcystis*, and the methanotroph *Methylocystis*. Meanwhile, selected  
391 ASVs found to be differentially enriched at the skin surface included taxa previously reported  
392 as fish microbiome commensals, such as *Cetobacterium*, as well as additional fish related taxa,  
393 which in some cases can be associated with diseases, such as *Aeromonas*, *Pseudomonas*,  
394 *Staphylococcus*, and *Streptococcus*.

395

### 396 **3.3. Tilapia species differences**

397 This study featured two tilapia species commonly cultured in Malawi (*Coptodon rendalli* and  
398 *Oreochromis shiranus*). No significant difference of prokaryotic community alpha diversity  
399 were observed between species (Fig. S5) and while beta diversity did showed potentially  
400 unique community structures between species, this only explained 11% of variance. Pond site  
401 in contrast explained 50% of variance in beta diversity. Additionally, intra-species dispersion  
402 of *C. rendalli* prokaryotic communities (Average distance to median 54.49) was similar to any  
403 inter-species dispersion observed between *C. rendalli* and *O. shiranus* at Blantyre (Average  
404 distance to median 53.79).

405

### 406 **3.4. Tilapia skin core microbiome**

407 To further explore specific taxa prevalent within the skin microbial communities we identified  
408 14 prokaryotic core genera of tilapia skin. Abundances of these core genera are depicted for  
409 both fish skin and pond water samples in Figure 5. Two of the prokaryotic core genera had a  
410 clear enrichment of abundance in the fish skin versus to pond water, namely ASV47:  
411 *Pseudomonas* and ASV8731: *Sphingomonas*. The remaining prokaryotic genera were found at  
412 high abundance in both pond water and skin samples, despite being classified as part of the  
413 tilapia skin core microbiome.

414

## 415 **4. Discussion**

416 Previous work has highlighted the collective contributions of microbial symbionts, the host and  
417 the environment to fish health and disease susceptibility under the pathobiome concept (Bass  
418 et al., 2019). Applying this framework to aquaculture production of finfish, the skin mucosal  
419 surface microbiome and its direct interface with the environment is likely to play a role in the  
420 maintenance of fish health and disease resilience. However, relationships between the  
421 microbial assemblages on the skin of fish in culture and their aquatic environment remain  
422 poorly established. Here, we characterised the prokaryotic and microeukaryotic communities

423 of the tilapia skin mucosal surface and accompanying water in aquaculture ponds of southern  
424 Malawi in the absence of detectable disease to develop a holistic understanding of the  
425 relationships between these microbial communities and niches in healthy animals and  
426 environments, and against which future studies may assess how microbial dysbiosis contributes  
427 to disease onset.

428 In this study, biogeographic factors played a key role in determining the diversity and  
429 structure of pond water microbial communities. Pond location explained 88% of prokaryotic  
430 and 76% of microeukaryotic beta diversity separation in microbial abundance profiles.  
431 Significant differences in richness and alpha diversity were observed between the seven pond  
432 sites. In freshwater ecosystems, both neutral and deterministic processes contribute to the  
433 separation of microbial assemblages (Lear et al., 2014; Lee et al., 2013). Interestingly, just over  
434 1% of prokaryotic pond water ASVs were detected in all seven pond sites, suggesting limited  
435 species dispersal and/or distinct micro-ecologies between ponds. Numerous environmental  
436 selective pressures could play a role in the divergence in ASVs between ponds, such as  
437 alternative feeding regimes (Deng et al., 2019), differences in water physiochemistry (Qin et  
438 al., 2016) and differences in pond treatments, that can include the use of probiotics (Wu et al.,  
439 2016) and manure fertilisers (Minich et al., 2018). Within a pond complex, some of these  
440 factors will be conserved, such as weather and water source. Yet microbial community  
441 divergence was still observed between ponds in the Blantyre pond complex, with two notable  
442 clusters of pond sites (1,4,5 and 2,3).

443 The tight clustering of pond water samples was concurrent between both prokaryotic  
444 and microeukaryotic communities suggesting cross-domain relationships shaped by ecological  
445 or environmental processes. This connection has recently been observed in shrimp culture  
446 ecosystems, with the deterministic process of homogenous selection largely responsible (Zhou  
447 et al., 2021). In this theory, each pond site cluster represents a comparable set of environmental  
448 conditions (be it nitrogen, phosphorous or oxygen availability) that exerts strong selective  
449 pressures on both prokaryotic and microeukaryotic communities (Zhou and Ning, 2017).  
450 Additionally, direct cross-domain ecological interactions may contribute to the observed  
451 trends. For instance, phagotrophic protists and their prokaryotic prey have negative interactions  
452 (Sherr and Sherr, 2002), while microalgae and bacteria can show all manner of symbiotic  
453 relationships, including extensive cross-feeding (Fuentes et al., 2016; Ramanan et al., 2016).

454 The close proximities of microbial communities of pond water with those in the fish  
455 outer mucosal surfaces mean they are physically closely interconnected, yet pond and skin  
456 microbiomes clearly differ. Our results demonstrate these differences in prokaryotic  
457 community structure, with ASV richness differing significantly, and separation by beta  
458 diversity. However, there was no significant difference in alpha diversity, a finding previously  
459 reported in freshwater and marine environments (Chiarello et al., 2015; Reinhart et al., 2019;  
460 Webster et al., 2018). At finer taxonomic scales further separation between the skin and pond  
461 water profiles was seen, and conserved across all ponds sites, with 25 ASVs differentially  
462 enriched at the fish skin mucosal surface. The abundances assessed at coarse taxonomic  
463 classifications reflected previous reports, namely that Proteobacteria (and in particular  
464 Gammaproteobacteria) dominated the fish skin mucosal surface, as seen in a variety of  
465 freshwater cichlids (Krotman et al., 2020); reviewed in depth by Gomez and Primm (2021).  
466 The next most abundant bacterial classes in the fish skin were Verrucomicrobiae, Bacteroidia  
467 and Clostridia. The pond water was similarly dominated by Proteobacteria, followed by  
468 Cyanobacteria and Planctomycetes, which is in accordance with a previous report of the  
469 bacterioplankton community in Nile tilapia aquaculture ponds in China (Fan et al., 2016).

470 Despite divergent abundance profiles, there was a high number of taxa shared between  
471 pond water and skin mucosa. Only 8% of the total fish skin ASVs were unique to the skin,  
472 which contrasts with that for reports on some other fish species. For example, in freshwater

473 river-dwelling mature northern pike, *Esox lucius* L., 36% of skin taxa were not detected in  
474 samples of the surrounding water (Reinhart et al., 2019). In a study on freshwater Atlantic  
475 salmon, *Salmo salar* L., this figure was 73% (Webster et al., 2018), where fry (8-9 months  
476 post-hatch) were sampled from both wild rivers and hatcheries. Both of these studies were in  
477 natural aquatic environments and flow-through systems with high water exchange rates which  
478 is very different from typical carp and tilapia earthen aquaculture ponds, where daily water  
479 exchange rates tend to be very limited, typically a maximum of 20% total pond volume (Nhan  
480 et al., 2008). In fact, often in Africa and Asia during dry seasons, due to the lack of water  
481 availability, there is no daily water exchange at all in tilapia earthen aquaculture ponds. Such  
482 static conditions and high stocking densities may be reflected in a greater microbial crossover  
483 between fish skin and pond water. Given the common taxa seen between the tilapia skin and  
484 pond water environments, it is noteworthy that we found no correlation in ASV richness or  
485 Shannon diversity between the pond and skin niches within each pond site. This finding  
486 supports the hypothesis that the skin and pond water niches support uniquely structured  
487 microbial communities.

488 The core microbiome refers to taxa found in the majority of samples which, by  
489 inference, may therefore play an important functional role in the microbiome. Fourteen  
490 prokaryotic core genera (from a total 770 genera) were identified in tilapia skin, consistent with  
491 previously published findings from other studies of fewer than 20 core OTUs on fish skin  
492 (reviewed by Gomex and Primm, 2021; Rosado, Pérez-Losada, et al., 2019a). Among the core  
493 genera found in the tilapia skin, *Cetobacterium* has been widely reported as a core genus in the  
494 gut of freshwater fish (Liu et al., 2016; Sharpton et al., 2021), including tilapia (Bereded et al.,  
495 2020; Elsaied et al., 2019). This genus may represent an important functional symbiont, and is  
496 reputed to synthesise vitamin B12 and antimicrobial metabolites (Tsuchiya et al., 2007). Other  
497 core genera and differentially enriched taxa of the skin are listed in Supplementary Table 3.  
498 Ten of the fish skin core genera were also detected at relatively high abundance in pond water.  
499 These include *Cyanobium* and *Methylocystis* (two of the most abundant and differentially  
500 enriched phytoplankton in pond water), which may have resulted from swab sampling  
501 incorporating some residual pond water. Some studies propose only retaining ASVs unique to  
502 swab samples and those statistically enriched from water samples to avoid this possible  
503 complication (Krotman et al., 2020). This approach, however, risks underestimating diversity  
504 and missing key taxa of the fish skin that through mucosal sloughing may still be detected at  
505 high abundances in water. The majority of studies make no corrections; instead, acknowledging  
506 crossover is inevitable and representative of these niches.

507 While the current study included two different species of tilapia, geographic location  
508 (and the associated environmental factors) of each pond site appeared to be a stronger influence  
509 of prokaryotic fish skin communities than any species differences observed between *C. rendalli*  
510 and *O. shiranus*. This suggests species is a complicating factor in our study but is of lesser  
511 importance when considering the broader trends of microbial community separation between  
512 pond water and fish skin. The importance of habitat over host taxonomy has previously been  
513 demonstrated for a large-scale study of marine fish gut microbiomes (Kim et al., 2021).

514 Several of the bacterial genera we found to be differentially abundant in fish skin  
515 contained species pathogenic to tilapia, including *Aeromonas (hydrophila)* (Dong et al., 2017),  
516 *Streptococcus (agalactiae)* (Zhang, 2021) and *Pseudomonas (fluorescens)* (Hal and El-  
517 Barbary, 2020). In addition to these fish skin enriched genera, further potentially pathogenic  
518 taxa were detected in pond water and fish skin. Namely, *Plesiomonas (shigelloides)* (Liu et al.,  
519 2015), *Flavobacterium (columnare)* (Dong et al., 2015) and *Acinetobacter* spp. an emerging  
520 group of freshwater fish pathogens (Malick et al., 2020). Likewise, among the detected  
521 microeukaryotic genera, there were species pathogenic to tilapia, including the parasitic ciliate  
522 *Ichthyophthirius multifiliis* (El-Dien and Abdel-Gaber, 2009) and two skin-targeting

523 pathogenic oomycetes, *Aphanomyces invadans* (OIE, 2013) and *Saprolegnia parasitica*  
524 (Ellison et al., 2018) but the metabarcoding of short hypervariable regions of marker genes  
525 does not allow us to accurately assign species or strain level classifications to determine their  
526 pathogenicity. The detected genera also contain numerous non-pathogenic species. The above  
527 ‘pathogens’ were all at very low (typically less than 1%) relative abundances in fish skin, and  
528 indeed none of these ponds had any reported incidence of disease. This work does not preclude  
529 the fact that other pathogens may be present below the limits of detection thresholds or  
530 taxonomic resolution. Presence may raise the risk of opportunistic disease as primary or  
531 secondary pathogens if environmental stressors create a state of dysbiosis in the fish skin to  
532 favour pathobiont propagation, leading to disease onset (Bass et al., 2019).

533 Contrary to pathogenesis, many of the detected fish skin microbes will exhibit  
534 commensal or mutualist relationships with their fish host. For instance, symbiotic bacteria can  
535 provide colonisation resistance against pathogens through competition for nutrients and  
536 adhesion sites (Legrand et al., 2018). In the microeukaryotic kingdom, ciliates were among the  
537 most widely detected taxa of tilapia skin and may offer beneficial roles to the fish by predated  
538 upon other microorganisms (Pinheiro and Bols, 2013). Although, the precise functional roles  
539 played by symbiotic bacteria and protists of the fish skin remain almost entirely unresolved.

540 Fish skin microbiomes are inherently variable between populations (Webster et al.,  
541 2018), species (Chiarello et al., 2018), individuals in the same environment, and even across  
542 different areas of skin (anal, caudal, dorsal and pectoral fins) of the same individual (Chiarello  
543 et al., 2015). We observed separation of fish skin communities according to environment (pond  
544 site), however inter-individual dispersion within pond sites was considerable, and the degree  
545 of dispersion between pond sites was significantly different. This compares to pond water  
546 microbiomes showing strong similarities within sites, suggesting the fish skin microbiome is  
547 less subjected to environmental influences. This may be due to host factors enabling greater  
548 buffering tolerance against environmental directed microbial community assembly. Host  
549 genetics is further known to contribute to the inter-individual variation of fish skin communities  
550 (Boutin et al., 2014). Additionally, fish age has been seen to influence individual taxa  
551 abundances but offers a limited explanation of inter-individual variation at the microbial  
552 community level (Rosado et al., 2021). To account for the observed inter-individual variation  
553 of fish skin microbiomes we recommend increased fish numbers (6 or more) per  
554 treatment/location during sampling campaigns.

555 In contrast to the variability of fish skin, pond water communities were more consistent  
556 across sample sites. At most pond sites, one photoautotroph (*Cyanobium* or *Synechocystis*) was  
557 dominant, at up to 20% relative abundance. While *Synechocystis* is well studied as a model  
558 organism, little is known of *Cyanobium* and its large contribution to primary production despite  
559 being among the most abundant taxa in carp aquaculture ponds (Marmen et al., 2021) and  
560 freshwater lakes (Rogers et al., 2021). Additionally, the harmful algal bloom agent *Microcystis*  
561 was detected at very high abundance in pond sites 5, 6 and 7, which is concurrent with  
562 observations of rich blue-green algae during sampling. *Microcystis* (see Marmen et al., 2021,  
563 2016; Zimba and Grimm, 2003), and its toxin microcystin, are frequently detected in  
564 aquaculture ponds and can have toxic effects in tilapia (Abdel-Latif and Khashaba, 2017).  
565 Conversely, eukaryotic microalgae, in particular diatoms, contribute positively to the  
566 freshwater ecosystem as key primary producers and stabilisers of water quality (Guedes and  
567 Malcata, 2012; Li et al., 2017). The barbed spines of some diatoms (*Chaetoceros* spp.),  
568 however, can cause gill haemorrhage in saltwater aquaculture (Yang and Albright, 1992). Pond  
569 sites 2, 3 and 6 were dominated by several diatoms, including *Cyclotella*, *Nitzschia* and  
570 *Aulacoseira*. In other pond sites, many high abundance ASVs remained unclassified beyond  
571 kingdom level, however, BLASTn searches suggested several of these were photosynthetic  
572 microalgae and likely contribute to oxygen cycling.

573

## 574 **5. Conclusions**

575 This study highlights the diversity, structure and variance of the microbial communities found  
576 in tilapia skin and pond water, and characterises the microbiomes for ‘healthy’ earthen  
577 aquaculture ponds in Malawi. Future studies seeking to establish relationships between  
578 dysbiosis and disease states need to take into account the inter-individual variation between  
579 fish, and community variance across pond sites that also occurs within the same pond complex.  
580 We found a large degree of taxa crossover between fish skin and pond water, some of which  
581 may be reflective of swab sampling bias, but also unique microbial communities supported by  
582 each niche. The identified core genera and differentially enriched taxa may represent conserved  
583 markers of tilapia skin, whose presence and abundance should be considered in future dysbiosis  
584 events, albeit in most cases the functional host relation of these taxa at the level of fish skin  
585 remains to be determined. Developing a deeper understanding on the microbial communities,  
586 particularly those that interface between the aquatic environment and culture species from  
587 different geographies, is critical for understanding health risks in aquaculture species as  
588 production expands and intensifies, bringing with it an increased risk of dysbiosis and  
589 incidence of disease.

590

## 591 **6. Author contribution statement**

592 Conceptualisation CRT, DB, BT; Fieldwork CRT, DB, CG, JN; Formal analysis JM, DLC;  
593 Funding acquisition CRT and DB; Methodology SA, DLC; Supervision CRT, DLC, JDD, BT,  
594 JC; Visualisation JM, DLC; Writing JM & CRT; Editing JM, SA, DLC, DB, CG, JDD, CVM,  
595 JC, BT and CRT.

596

## 597 **7. Funding**

598 This work was funded by the BBSRC/Newton Fund project (BB/N00504X/1). JM was  
599 supported by the BBSRC/South West Biosciences Doctoral Training Partnership  
600 (BB/M009122/1) with CASE partners WorldFish and Cefas. Sequencing was performed at the  
601 Exeter Sequencing Service, using equipment funded by the Wellcome Trust Institutional  
602 Strategic Support Fund (WT097835MF), Wellcome Trust Multi-User Equipment Award  
603 (WT101650MA) and BBSRC LOLA award (BB/K003240/1). This work was further supported  
604 by the CGIAR Research Program on Fish Agri-Food Systems (FISH) led by WorldFish. CC  
605 and JN salaries were supported by WorldFish.

606

## 607 **8. Acknowledgements**

608 We thank, for their contributions to this work, Karen Moore, Audrey Farbos and Paul O'Neill  
609 from the Exeter Sequencing Service; Nicola Rogers for project management (Newton Fund  
610 project); and John Dowdle for lab management during the practical work.

611

## 612 **9. References**

- 613 Abdel-Latif, H.M.R., Khashaba, A.M.A., 2017. Subchronic toxicity of Nile tilapia with  
614 different exposure routes to *Microcystis aeruginosa*: Histopathology, liver functions,  
615 and oxidative stress biomarkers. *Vet. World* 10, 955–963.  
616 <https://doi.org/10.14202/vetworld.2017.955-963>
- 617 Abdel-Tawwab, M., Hagra, A.E., Elbaghdady, H.A.M., Monier, M.N., 2014. Dissolved  
618 Oxygen Level and Stocking Density Effects on Growth, Feed Utilization, Physiology,  
619 and Innate Immunity of Nile Tilapia, *Oreochromis niloticus*. *J. Appl. Aquac.* 26, 340–  
620 355. <https://doi.org/10.1080/10454438.2014.959830>
- 621 Apprill, A., McNally, S., Parsons, R., Weber, L., 2015. Minor revision to V4 region SSU

- 622 rRNA 806R gene primer greatly increases detection of SAR11 bacterioplankton. *Aquat.*  
623 *Microb. Ecol.* 75, 129–137. <https://doi.org/10.3354/ame01753>
- 624 Audebert, C., Even, G., Cian, A., Loywick, A., Merlin, S., Viscogliosi, E., Chabé, M., 2016.  
625 Colonization with the enteric protozoa *Blastocystis* is associated with increased diversity  
626 of human gut bacterial microbiota. *Sci. Rep.* 6, 25255. <https://doi.org/10.1038/srep25255>
- 627 Bass, D., del Campo, J., 2020. Microeukaryotes in animal and plant microbiomes: Ecologies  
628 of disease? *Eur. J. Protistol.* 76, 125719. <https://doi.org/10.1016/j.ejop.2020.125719>
- 629 Bass, D., Stentiford, G.D., Wang, H.-C., Koskella, B., Tyler, C.R., 2019. The Pathobiome in  
630 Animal and Plant Diseases. *Trends Ecol. Evol.* 34, 996–1008.  
631 <https://doi.org/10.1016/j.tree.2019.07.012>
- 632 Beghini, F., Pasolli, E., Truong, T.D., Putignani, L., Cacciò, S.M., Segata, N., 2017. Large-  
633 scale comparative metagenomics of *Blastocystis*, a common member of the human gut  
634 microbiome. *ISME J.* 11, 2848–2863. <https://doi.org/10.1038/ismej.2017.139>
- 635 Benoiston, A.-S., Ibarbalz, F.M., Bittner, L., Guidi, L., Jahn, O., Dutkiewicz, S., Bowler, C.,  
636 2017. The evolution of diatoms and their biogeochemical functions. *Philos. Trans. R.*  
637 *Soc. B Biol. Sci.* 372, 20160397. <https://doi.org/10.1098/rstb.2016.0397>
- 638 Bereded, N.K., Curto, M., Domig, K.J., Abebe, G.B., Fanta, S.W., Waidbacher, H.,  
639 Meimberg, H., 2020. Metabarcoding Analyses of Gut Microbiota of Nile Tilapia  
640 (*Oreochromis niloticus*) from Lake Awassa and Lake Chamo, Ethiopia. *Microorganisms*  
641 8, 1040. <https://doi.org/10.3390/microorganisms8071040>
- 642 Bondad-Reantaso, M.G., Subasinghe, R.P., Arthur, J.R., Ogawa, K., Chinabut, S., Adlard, R.,  
643 Tan, Z., Shariff, M., 2005. Disease and health management in Asian aquaculture. *Vet.*  
644 *Parasitol.* 132, 249–272. <https://doi.org/10.1016/j.vetpar.2005.07.005>
- 645 Boutin, S., Bernatchez, L., Audet, C., Derôme, N., 2013. Network analysis highlights  
646 complex interactions between pathogen, host and commensal microbiota. *PLoS One* 8,  
647 1–16. <https://doi.org/10.1371/journal.pone.0084772>
- 648 Boutin, S., Sauvage, C., Bernatchez, L., Audet, C., Derome, N., 2014. Inter Individual  
649 Variations of the Fish Skin Microbiota: Host Genetics Basis of Mutualism? *PLoS One* 9,  
650 e102649. <https://doi.org/10.1371/journal.pone.0102649>
- 651 Bramwell, P.A., Barallon, R. V., Rogers, H.J., Bailey, M.J., 1995. Extraction and PCR  
652 amplification of DNA from the rhizoplane, in: *Molecular Microbial Ecology Manual*.  
653 Springer Netherlands, Dordrecht, pp. 89–108. [https://doi.org/10.1007/978-94-011-0351-0\\_9](https://doi.org/10.1007/978-94-011-0351-0_9)
- 654
- 655 Callahan, B.J., McMurdie, P.J., Rosen, M.J., Han, A.W., Johnson, A.J.A., Holmes, S.P.,  
656 2016. DADA2: High-resolution sample inference from Illumina amplicon data. *Nat.*  
657 *Methods* 13, 581.
- 658 Carlson, J.M., Hyde, E.R., Petrosino, J.F., Manage, A.B.W., Primm, T.P., 2015. The host  
659 effects of *Gambusia affinis* with an antibiotic-disrupted microbiome. *Comp. Biochem.*  
660 *Physiol. Part C Toxicol. Pharmacol.* 178, 163–168.  
661 <https://doi.org/10.1016/j.cbpc.2015.10.004>
- 662 CASA, 2020. Aquaculture Sector Strategy – Malawi.
- 663 Chiarello, M., Auguet, J.-C., Bettarel, Y., Bouvier, C., Claverie, T., Graham, N.A.J.,  
664 Rieuvilleneuve, F., Sucré, E., Bouvier, T., Villéger, S., 2018. Skin microbiome of coral  
665 reef fish is highly variable and driven by host phylogeny and diet. *Microbiome* 6, 147.  
666 <https://doi.org/10.1186/s40168-018-0530-4>
- 667 Chiarello, M., Villéger, S., Bouvier, C., Bettarel, Y., Bouvier, T., 2015. High diversity of  
668 skin-associated bacterial communities of marine fishes is promoted by their high  
669 variability among body parts, individuals and species. *FEMS Microbiol. Ecol.* 91, 1–12.  
670 <https://doi.org/10.1093/femsec/fiv061>
- 671 Davis, N.M., Proctor, D.M., Holmes, S.P., Relman, D.A., Callahan, B.J., 2018. Simple

- 672 statistical identification and removal of contaminant sequences in marker-gene and  
673 metagenomics data. *Microbiome* 6, 226. <https://doi.org/10.1186/s40168-018-0605-2>
- 674 del Campo, J., Bass, D., Keeling, P.J., 2019. The eukaryome: Diversity and role of  
675 microeukaryotic organisms associated with animal hosts. *Funct. Ecol.* 1–10.  
676 <https://doi.org/10.1111/1365-2435.13490>
- 677 Delamare-Deboutteville, J., Khor, L., Chadag, V., 2021. Quick fish sampling guide for  
678 disease diagnostics - Microbiome sampling guide. WorldFish.
- 679 Deng, Y., Zhou, F., Ruan, Y., Ma, B., Ding, X., Yue, X., Ma, W., Yin, X., 2019. Feed Types  
680 Driven Differentiation of Microbial Community and Functionality in Marine Integrated  
681 Multitrophic Aquaculture System. *Water* 12, 95. <https://doi.org/10.3390/w12010095>
- 682 Dixon, P., 2003. VEGAN, a package of R functions for community ecology. *J. Veg. Sci.* 14,  
683 927–930. <https://doi.org/10.1111/j.1654-1103.2003.tb02228.x>
- 684 Doane, M.P., Morris, M.M., Papudeshi, B., Allen, L., Pande, D., Haggerty, J.M., Johri, S.,  
685 Turnlund, A.C., Peterson, M., Kacev, D., Nosal, A., Ramirez, D., Hovel, K., Ledbetter,  
686 J., Alker, A., Avalos, J., Baker, K., Bhide, S., Billings, E., Byrum, S., Clemens, M.,  
687 Demery, A.J., Lima, L.F.O., Gomez, O., Gutierrez, O., Hinton, S., Kieu, D., Kim, A.,  
688 Loaiza, R., Martinez, A., McGhee, J., Nguyen, K., Parlan, S., Pham, A., Price-Waldman,  
689 R., Edwards, R.A., Dinsdale, E.A., 2020. The skin microbiome of elasmobranchs  
690 follows phylosymbiosis, but in teleost fishes, the microbiomes converge. *Microbiome* 8,  
691 93. <https://doi.org/10.1186/s40168-020-00840-x>
- 692 Dong, H.T., LaFrentz, B., Pirarat, N., Rodkhum, C., 2015. Phenotypic characterization and  
693 genetic diversity of *Flavobacterium columnare* isolated from red tilapia, *Oreochromis*  
694 sp., in Thailand. *J. Fish Dis.* 38, 901–913. <https://doi.org/10.1111/jfd.12304>
- 695 Dong, H.T., Techatanakitarnan, C., Jindakittikul, P., Thaiprayoon, A., Taengphu, S.,  
696 Charoensapsri, W., Khunrae, P., Rattanaojpong, T., Senapin, S., 2017. *Aeromonas*  
697 *jandaei* and *Aeromonas veronii* caused disease and mortality in Nile tilapia,  
698 *Oreochromis niloticus* (L.). *J. Fish Dis.* 40, 1395–1403.  
699 <https://doi.org/10.1111/jfd.12617>
- 700 El-Dien, A.H.S., Abdel-Gaber, R.A., 2009. *Ichthyophthirius multifiliis* infection induces  
701 apoptosis in different species of Tilapia. *J. Egypt. Soc. Parasitol.* 39, 665–678.
- 702 El-Sayed, A.F.M., 2019. Tilapia Culture, 2nd ed. Academic Press.
- 703 Ellison, A.R., Uren Webster, T.M., Rey, O., Garcia de Leaniz, C., Consuegra, S., Orozco-  
704 terWengel, P., Cable, J., 2018. Transcriptomic response to parasite infection in Nile  
705 tilapia (*Oreochromis niloticus*) depends on rearing density. *BMC Genomics* 19, 723.  
706 <https://doi.org/10.1186/s12864-018-5098-7>
- 707 Ellison, A.R., Wilcockson, D., Cable, J., 2021. (Accepted/In press). Circadian dynamics of  
708 the teleost skin immune-microbiome interface. *Microbiome*.  
709 <https://doi.org/10.1101/2021.01.29.428758>
- 710 Elsaied, H.E., Soliman, T., Abu-Taleb, H.T., Goto, H., Jenke-Kodam, H., 2019. Phylogenetic  
711 characterization of eukaryotic and prokaryotic gut flora of Nile tilapia, *Oreochromis*  
712 *niloticus*, along niches of Lake Nasser, Egypt, based on rRNA gene high-throughput  
713 sequences. *Ecol. Genet. Genomics* 11, 100037.  
714 <https://doi.org/10.1016/j.egg.2019.100037>
- 715 Fan, L.M., Barry, K., Hu, G.D., Meng, S. long, Song, C., Wu, W., Chen, J.Z., Xu, P., 2016.  
716 Bacterioplankton community analysis in tilapia ponds by Illumina high-throughput  
717 sequencing. *World J. Microbiol. Biotechnol.* 32, 10. <https://doi.org/10.1007/s11274-015-718-1962-7>
- 719 Food and Agriculture Organization of the United Nations (FAO), 2020a. The State of World  
720 Fisheries and Aquaculture 2020. Sustainability in Action. Rome.  
721 <https://doi.org/10.4060/ca9229en>

- 722 Food and Agriculture Organization of the United Nations (FAO), 2020b. Fishery and  
723 Aquaculture Statistics. Global aquaculture production 1950-2018 (FishStatJ) [WWW  
724 Document]. FAO Fish. Aquac. Dep. URL  
725 [www.fao.org/fishery/statistics/software/fishstatj/en](http://www.fao.org/fishery/statistics/software/fishstatj/en)
- 726 Food and Agriculture Organization of the United Nations (FAO), 2020c. Cultured Aquatic  
727 Species Information Programme *Oreochromis niloticus* (Linnaeus, 1758) [WWW  
728 Document]. URL [http://www.fao.org/fishery/cultured-species/Oreochromis\\_niloticus/en](http://www.fao.org/fishery/cultured-species/Oreochromis_niloticus/en)  
729 (accessed 7.16.20).
- 730 Foster, Z.S.L., Sharpton, T.J., Grünwald, N.J., 2017. Metacoder: An R package for  
731 visualization and manipulation of community taxonomic diversity data. PLOS Comput.  
732 Biol. 13, e1005404. <https://doi.org/10.1371/journal.pcbi.1005404>
- 733 Fuentes, J., Garbayo, I., Cuaresma, M., Montero, Z., González-del-Valle, M., Vilchez, C.,  
734 2016. Impact of Microalgae-Bacteria Interactions on the Production of Algal Biomass  
735 and Associated Compounds. Mar. Drugs 14, 100. <https://doi.org/10.3390/md14050100>
- 736 Gadoin, E., Desnues, C., Monteil-Bouchard, S., Bouvier, T., Auguet, J.-C., Roque  
737 d'Orbcastel, E., Bettarel, Y., 2021. Fishing for the Virome of Tropical Tuna. Viruses 13,  
738 1291. <https://doi.org/10.3390/v13071291>
- 739 Gomez, J.A., Primm, T.P., 2021. A Slimy Business: the Future of Fish Skin Microbiome  
740 Studies. Microb. Ecol. <https://doi.org/10.1007/s00248-020-01648-w>
- 741 Guedes, A.C., Malcata, F.X., 2012. Nutritional Value and Uses of Microalgae in  
742 Aquaculture, in: Muchlisin, Z. (Ed.), Aquaculture. IntechOpen.  
743 <https://doi.org/10.5772/30576>
- 744 Guillou, L., Bachar, D., Audic, S., Bass, D., Berney, C., Bittner, L., Boutte, C., Burgaud, G.,  
745 de Vargas, C., Decelle, J., del Campo, J., Dolan, J.R., Dunthorn, M., Edvardsen, B.,  
746 Holzmann, M., Kooistra, W.H.C.F., Lara, E., Le Bescot, N., Logares, R., Mahé, F.,  
747 Massana, R., Montresor, M., Morard, R., Not, F., Pawlowski, J., Probert, I., Sauvadet,  
748 A.-L., Siano, R., Stoeck, T., Vaultot, D., Zimmermann, P., Christen, R., 2012. The  
749 Protist Ribosomal Reference database (PR2): a catalog of unicellular eukaryote Small  
750 Sub-Unit rRNA sequences with curated taxonomy. Nucleic Acids Res. 41, D597–D604.  
751 <https://doi.org/10.1093/nar/gks1160>
- 752 Hal, A.M., El-Barbary, M.I., 2020. Gene expression and histopathological changes of Nile  
753 tilapia (*Oreochromis niloticus*) infected with *Aeromonas hydrophila* and *Pseudomonas*  
754 *fluorescens*. Aquaculture 526, 735392.  
755 <https://doi.org/10.1016/j.aquaculture.2020.735392>
- 756 Henchion, M., Hayes, M., Mullen, A., Fenelon, M., Tiwari, B., 2017. Future Protein Supply  
757 and Demand: Strategies and Factors Influencing a Sustainable Equilibrium. Foods 6, 53.  
758 <https://doi.org/10.3390/foods6070053>
- 759 Hinchliffe, S., Butcher, A., Rahman, M.M., Guildler, J., Tyler, C., Verner-Jeffreys, D., 2020.  
760 Production without medicalisation – risk practices and disease in Bangladesh  
761 aquaculture. Geogr. J. geoj.12371. <https://doi.org/10.1111/geoj.12371>
- 762 Kanther, M., Tomkovich, S., Xiaolun, S., Grosser, M.R., Koo, J., Flynn, E.J., Jobin, C.,  
763 Rawls, J.F., 2014. Commensal microbiota stimulate systemic neutrophil migration  
764 through induction of Serum amyloid A. Cell. Microbiol. 16, 1053–1067.  
765 <https://doi.org/10.1111/cmi.12257>
- 766 Kelly, C., Salinas, I., 2017. Under Pressure: Interactions between Commensal Microbiota and  
767 the Teleost Immune System. Front. Immunol. 8.  
768 <https://doi.org/10.3389/fimmu.2017.00559>
- 769 Kim, P.S., Shin, N.-R., Lee, J.-B., Kim, M.-S., Whon, T.W., Hyun, D.-W., Yun, J.-H., Jung,  
770 M.-J., Kim, J.Y., Bae, J.-W., 2021. Host habitat is the major determinant of the gut  
771 microbiome of fish. Microbiome 9, 166. <https://doi.org/10.1186/s40168-021-01113-x>



- 772 Krotman, Y., Yergaliyev, T.M., Alexander Shani, R., Avrahami, Y., Szitenberg, A., 2020.  
773 Dissecting the factors shaping fish skin microbiomes in a heterogeneous inland water  
774 system. *Microbiome* 8, 1–15. <https://doi.org/10.1186/s40168-020-0784-5>
- 775 Kuznetsova, A., Brockhoff, P.B., Christensen, R.H.B., 2017. lmerTest Package: Tests in  
776 Linear Mixed Effects Models. *J. Stat. Softw.* 82. <https://doi.org/10.18637/jss.v082.i13>
- 777 Laforest-Lapointe, I., Arrieta, M.-C., 2018. Microbial Eukaryotes: a Missing Link in Gut  
778 Microbiome Studies. *mSystems* 3. <https://doi.org/10.1128/mSystems.00201-17>
- 779 Lahti, L., Shetty, S., 2017. Tools for microbiome analysis in R.
- 780 Lane, D.J., 1991. 16S/23S sequencing, in: Stackerbrant, E., Goodfellow, M. (Eds.), *Nucleic  
781 Acid Techniques*. Wiley, New York, pp. 115–175.
- 782 Lear, G., Bellamy, J., Case, B.S., Lee, J.E., Buckley, H.L., 2014. Fine-scale spatial patterns in  
783 bacterial community composition and function within freshwater ponds. *ISME J.* 8,  
784 1715–1726. <https://doi.org/10.1038/ismej.2014.21>
- 785 Lee, J.E., Buckley, H.L., Etienne, R.S., Lear, G., 2013. Both species sorting and neutral  
786 processes drive assembly of bacterial communities in aquatic microcosms. *FEMS  
787 Microbiol. Ecol.* 86, 288–302. <https://doi.org/10.1111/1574-6941.12161>
- 788 Legrand, T.P.R.A., Catalano, S.R., Wos-Oxley, M.L., Stephens, F., Landos, M., Bansemmer,  
789 M.S., Stone, D.A.J., Qin, J.G., Oxley, A.P.A., 2018. The inner workings of the outer  
790 surface: Skin and gill microbiota as indicators of changing gut health in Yellowtail  
791 Kingfish. *Front. Microbiol.* 8, 1–17. <https://doi.org/10.3389/fmicb.2017.02664>
- 792 Lever, M.A., Torti, A., Eickenbusch, P., Michaud, A.B., Šantl-Temkiv, T., Jørgensen, B.B.,  
793 2015. A modular method for the extraction of DNA and RNA, and the separation of  
794 DNA pools from diverse environmental sample types. *Front. Microbiol.* 6.  
795 <https://doi.org/10.3389/fmicb.2015.00476>
- 796 Li, X., Marella, T.K., Tao, L., Peng, L., Song, C., Dai, L., Tiwari, A., Li, G., 2017. A novel  
797 growth method for diatom algae in aquaculture waste water for natural food  
798 development and nutrient removal. *Water Sci. Technol.* 75, 2777–2783.  
799 <https://doi.org/10.2166/wst.2017.156>
- 800 Limbu, S.M., Zhou, L., Sun, S.X., Zhang, M.L., Du, Z.Y., 2018. Chronic exposure to low  
801 environmental concentrations and legal aquaculture doses of antibiotics cause systemic  
802 adverse effects in Nile tilapia and provoke differential human health risk. *Environ. Int.*  
803 115, 205–219. <https://doi.org/10.1016/j.envint.2018.03.034>
- 804 Link, J.S., Watson, R.A., 2019. Global ecosystem overfishing: Clear delineation within real  
805 limits to production. *Sci. Adv.* 5, eaav0474. <https://doi.org/10.1126/sciadv.aav0474>
- 806 Liu, H., Guo, X., Gooneratne, R., Lai, R., Zeng, C., Zhan, F., Wang, W., 2016. The gut  
807 microbiome and degradation enzyme activity of wild freshwater fishes influenced by  
808 their trophic levels. *Sci. Rep.* 6, 1–12. <https://doi.org/10.1038/srep24340>
- 809 Liu, Z., Ke, X., Lu, M., Gao, F., Cao, J., Zhu, H., Wang, M., 2015. Identification and  
810 pathological observation of a pathogenic *Plesiomonas shigelloides* strain isolated from  
811 cultured tilapia (*Oreochromis niloticus*). *Wei Sheng Wu Xue Bao* 55, 96–106.
- 812 Llewellyn, M.S., Leadbeater, S., Garcia, C., Sylvain, F.E., Custodio, M., Ang, K.P., Powell,  
813 F., Carvalho, G.R., Creer, S., Elliot, J., Derome, N., 2017. Parasitism perturbs the  
814 mucosal microbiome of Atlantic Salmon. *Sci. Rep.* 7, 1–10.  
815 <https://doi.org/10.1038/srep43465>
- 816 Malick, R.C., Bera, A.K., Chowdhury, H., Bhattacharya, M., Abdulla, T., Swain, H.S.,  
817 Baitha, R., Kumar, V., Das, B.K., 2020. Identification and pathogenicity study of  
818 emerging fish pathogens *Acinetobacter junii* and *Acinetobacter pittii* recovered from a  
819 disease outbreak in *Labeo catla* (Hamilton, 1822) and *Hypophthalmichthys molitrix*  
820 (Valenciennes, 1844) of freshwater wetland in. *Aquac. Res.* 51, 2410–2420.  
821 <https://doi.org/10.1111/are.14584>

- 822 Marmen, S., Aharonovich, D., Grossowicz, M., Blank, L., Yacobi, Y.Z., Sher, D.J., 2016.  
823 Distribution and Habitat Specificity of Potentially-Toxic *Microcystis* across Climate,  
824 Land, and Water Use Gradients. *Front. Microbiol.* 7.  
825 <https://doi.org/10.3389/fmicb.2016.00271>
- 826 Marmen, S., Fadeev, E., Al Ashhab, A., Benet-Perelberg, A., Naor, A., Patil, H.J., Cytryn, E.,  
827 Viner-Mozzini, Y., Sukenik, A., Lalzar, M., Sher, D., 2021. Seasonal Dynamics Are the  
828 Major Driver of Microbial Diversity and Composition in Intensive Freshwater  
829 Aquaculture. *Front. Microbiol.* 12. <https://doi.org/10.3389/fmicb.2021.679743>
- 830 Martin, B.D., Witten, D., Willis, A.D., 2020. Modeling microbial abundances and dysbiosis  
831 with beta-binomial regression. *Ann. Appl. Stat.* 14, 94–115. [https://doi.org/10.1214/19-](https://doi.org/10.1214/19-AOAS1283)  
832 [AOAS1283](https://doi.org/10.1214/19-AOAS1283)
- 833 McMurdie, P.J., Holmes, S., 2013. phyloseq: An R Package for Reproducible Interactive  
834 Analysis and Graphics of Microbiome Census Data. *PLoS One* 8, e61217.
- 835 Medlin, L., Elwood, H.J., Stickel, S., Sogin, M.L., 1988. The characterization of  
836 enzymatically amplified eukaryotic 16S-like rRNA-coding regions. *Gene* 71, 491–499.  
837 [https://doi.org/10.1016/0378-1119\(88\)90066-2](https://doi.org/10.1016/0378-1119(88)90066-2)
- 838 Minich, J.J., Zhu, Q., Xu, Z.Z., Amir, A., Ngochera, M., Simwaka, M., Allen, E.E., Zidana,  
839 H., Knight, R., 2018. Microbial effects of livestock manure fertilization on freshwater  
840 aquaculture ponds rearing tilapia (*Oreochromis shiranus*) and North African catfish  
841 (*Clarias gariepinus*). *Microbiologyopen* 7, 1–15. <https://doi.org/10.1002/mbo3.716>
- 842 Minniti, G., Hagen, L.H., Porcellato, D., Jørgensen, S.M., Pope, P.B., Vaaje-Kolstad, G.,  
843 2017. The skin-mucus microbial community of farmed Atlantic salmon (*Salmo salar*).  
844 *Front. Microbiol.* 8, 1–11. <https://doi.org/10.3389/fmicb.2017.02043>
- 845 Mohammed, H.H., Arias, C.R., 2015. Potassium permanganate elicits a shift of the external  
846 fish microbiome and increases host susceptibility to columnaris disease. *Vet. Res.* 46, 1–  
847 13. <https://doi.org/10.1186/s13567-015-0215-y>
- 848 Murray, A.G., Peeler, E.J., 2005. A framework for understanding the potential for emerging  
849 diseases in aquaculture. *Prev. Vet. Med.* 67, 223–235.  
850 <https://doi.org/10.1016/j.prevetmed.2004.10.012>
- 851 Nhan, D.K., Verdegem, M.C.J., Milstein, A., Verreth, J.A. V., 2008. Water and nutrient  
852 budgets of ponds in integrated agriculture-aquaculture systems in the Mekong Delta,  
853 Vietnam. *Aquac. Res.* 39, 1216–1228. [https://doi.org/10.1111/j.1365-](https://doi.org/10.1111/j.1365-2109.2008.01986.x)  
854 [2109.2008.01986.x](https://doi.org/10.1111/j.1365-2109.2008.01986.x)
- 855 OIE, 2013. Infection with *Aphanomyces invadans* (Epizootic Ulcerative Syndrome), in:  
856 *Manual of Diagnostic Tests for Aquatic Animals*. World Organisation for Animal  
857 Health.
- 858 Palarea-Albaladejo, J., Martín-Fernández, J.A., 2015. zCompositions — R package for  
859 multivariate imputation of left-censored data under a compositional approach. *Chemom.*  
860 *Intell. Lab. Syst.* 143, 85–96. <https://doi.org/10.1016/j.chemolab.2015.02.019>
- 861 Parada, A.E., Needham, D.M., Fuhrman, J.A., 2016. Every base matters: assessing small  
862 subunit rRNA primers for marine microbiomes with mock communities, time series and  
863 global field samples. *Environ. Microbiol.* 18, 1403–1414. [https://doi.org/10.1111/1462-](https://doi.org/10.1111/1462-2920.13023)  
864 [2920.13023](https://doi.org/10.1111/1462-2920.13023)
- 865 Perry, W.B., Lindsay, E., Payne, C.J., Brodie, C., Kazlauskaitė, R., 2020. The role of the gut  
866 microbiome in sustainable teleost aquaculture. *Proc. R. Soc. B Biol. Sci.* 287.  
867 <https://doi.org/10.1098/rspb.2020.0184>
- 868 Pinheiro, M.D.O., Bols, N.C., 2013. Use of Cell Cultures to Study the Interactions of Ciliates  
869 with Fish. *Springer Sci. Rev.* 1, 95–113. <https://doi.org/10.1007/s40362-013-0008-5>
- 870 Pulkkinen, K., Suomalainen, L.-R., Read, A.F., Ebert, D., Rintamäki, P., Valtonen, E.T.,  
871 2010. Intensive fish farming and the evolution of pathogen virulence: the case of

- 872 columnaris disease in Finland. Proc. R. Soc. B Biol. Sci. 277, 593–600.  
873 <https://doi.org/10.1098/rspb.2009.1659>
- 874 Qin, Y., Hou, J., Deng, M., Liu, Q., Wu, C., Ji, Y., He, X., 2016. Bacterial abundance and  
875 diversity in pond water supplied with different feeds. Sci. Rep. 6, 35232.  
876 <https://doi.org/10.1038/srep35232>
- 877 Quast, C., Pruesse, E., Yilmaz, P., Gerken, J., Schweer, T., Yarza, P., Peplies, J., Glöckner,  
878 F.O., 2012. The SILVA ribosomal RNA gene database project: improved data  
879 processing and web-based tools. Nucleic Acids Res. 41, D590–D596.  
880 <https://doi.org/10.1093/nar/gks1219>
- 881 Ramanan, R., Kim, B.-H., Cho, D.-H., Oh, H.-M., Kim, H.-S., 2016. Algae–bacteria  
882 interactions: Evolution, ecology and emerging applications. Biotechnol. Adv. 34, 14–29.  
883 <https://doi.org/10.1016/j.biotechadv.2015.12.003>
- 884 Reid, K.M., Patel, S., Robinson, A.J., Bu, L., Jarungsriapisit, J., Moore, L.J., Salinas, I.,  
885 2017. Salmonid alphavirus infection causes skin dysbiosis in Atlantic salmon (*Salmo*  
886 *salar* L.) post-smolts. PLoS One 12, 1–17. <https://doi.org/10.1371/journal.pone.0172856>
- 887 Reinhart, E.M., Korry, B.J., Rowan-Nash, A.D., Belenky, P., 2019. Defining the Distinct  
888 Skin and Gut Microbiomes of the Northern Pike (*Esox lucius*). Front. Microbiol. 10, 1–  
889 12. <https://doi.org/10.3389/fmicb.2019.02118>
- 890 Rogers, J.E., Devereux, R., James, J.B., George, S.E., Forshay, K.J., 2021. Seasonal  
891 Distribution of Cyanobacteria in Three Urban Eutrophic Lakes Results from an  
892 Epidemic-like Response to Environmental Conditions. Curr. Microbiol. 78, 2298–2316.  
893 <https://doi.org/10.1007/s00284-021-02498-6>
- 894 Rosado, D., Pérez-Losada, M., Pereira, A., Severino, R., Xavier, R., 2021. Effects of aging on  
895 the skin and gill microbiota of farmed seabass and seabream. Anim. Microbiome 3, 10.  
896 <https://doi.org/10.1186/s42523-020-00072-2>
- 897 Rosado, D., Pérez-Losada, M., Severino, R., Cable, J., Xavier, R., 2019a. Characterization of  
898 the skin and gill microbiomes of the farmed seabass (*Dicentrarchus labrax*) and  
899 seabream (*Sparus aurata*). Aquaculture 500, 57–64.  
900 <https://doi.org/10.1016/j.aquaculture.2018.09.063>
- 901 Rosado, D., Xavier, R., Severino, R., Tavares, F., Cable, J., Pérez-Losada, M., 2019b. Effects  
902 of disease, antibiotic treatment and recovery trajectory on the microbiome of farmed  
903 seabass (*Dicentrarchus labrax*). Sci. Rep. 9, 1–11. <https://doi.org/10.1038/s41598-019-55314-4>
- 904
- 905 Schliep, K.P., 2010. phangorn: phylogenetic analysis in R. Bioinformatics 27, 592–593.  
906 <https://doi.org/10.1093/bioinformatics/btq706>
- 907 Sharpton, T.J., Stagaman, K., Sieler, M.J., Arnold, H.K., Davis, E.W., 2021. Phylogenetic  
908 Integration Reveals the Zebrafish Core Microbiome and Its Sensitivity to Environmental  
909 Exposures. Toxics 9, 10. <https://doi.org/10.3390/toxics9010010>
- 910 Sherr, E.B., Sherr, B.F., 2002. Significance of predation by protists in aquatic microbial food  
911 webs. Antonie Van Leeuwenhoek 81, 293–308.  
912 <https://doi.org/10.1023/A:1020591307260>
- 913 Sundh, H., Finne-Fridell, F., Ellis, T., Taranger, G.L., Niklasson, L., Pettersen, E.F.,  
914 Wergeland, H.I., Sundell, K., 2019. Reduced water quality associated with higher  
915 stocking density disturbs the intestinal barrier functions of Atlantic salmon (*Salmo salar*  
916 L.). Aquaculture 512, 734356. <https://doi.org/10.1016/j.aquaculture.2019.734356>
- 917 Suphoronski, S.A., Chideroli, R.T., Facimoto, C.T., Mainardi, R.M., Souza, F.P., Lopera-  
918 Barrero, N.M., Jesus, G.F.A., Martins, M.L., Di Santis, G.W., de Oliveira, A.,  
919 Gonçalves, G.S., Dari, R., Frouel, S., Pereira, U.P., 2019. Effects of a phytogenic, alone  
920 and associated with potassium diformate, on tilapia growth, immunity, gut microbiome  
921 and resistance against francisellosis. Sci. Rep. 9, 6045. <https://doi.org/10.1038/s41598->

- 922 019-42480-8
- 923 Tan, H.Y., Chen, S.W., Hu, S.Y., 2019. Improvements in the growth performance, immunity,  
924 disease resistance, and gut microbiota by the probiotic *Rummeliibacillus stabekisii* in  
925 Nile tilapia (*Oreochromis niloticus*). *Fish Shellfish Immunol.* 92, 265–275.  
926 <https://doi.org/10.1016/j.fsi.2019.06.027>
- 927 Tarnecki, A.M., Brennan, N.P., Schloesser, R.W., Rhody, N.R., 2019. Shifts in the Skin-  
928 Associated Microbiota of Hatchery-Reared Common Snook *Centropomus undecimalis*  
929 During Acclimation to the Wild. *Microb. Ecol.* 77, 770–781.  
930 <https://doi.org/10.1007/s00248-018-1252-7>
- 931 Tsuchiya, C., Sakata, T., Sugita, H., 2007. Novel ecological niche of *Cetobacterium somerae*,  
932 an anaerobic bacterium in the intestinal tracts of freshwater fish. *Lett. Appl. Microbiol.*  
933 071018031740002-??? <https://doi.org/10.1111/j.1472-765X.2007.02258.x>
- 934 Warnecke, F., Amann, R., Pernthaler, J., 2004. Actinobacterial 16S rRNA genes from  
935 freshwater habitats cluster in four distinct lineages. *Environ. Microbiol.* 6, 242–253.  
936 <https://doi.org/10.1111/j.1462-2920.2004.00561.x>
- 937 Webster, T.M.U., Consuegra, S., Hitchings, M., de Leaniz, C.G., 2018. Interpopulation  
938 variation in the Atlantic salmon microbiome reflects environmental and genetic  
939 diversity. *Appl. Environ. Microbiol.* 84, 1–14. <https://doi.org/10.1128/AEM.000691-18>
- 940 Wu, D.X., Zhao, S.M., Peng, N., Xu, C.P., Wang, J., Liang, Y.X., 2016. Effects of a probiotic  
941 (*Bacillus subtilis* FY99-01) on the bacterial community structure and composition of  
942 shrimp (*Litopenaeus vannamei*, Boone) culture water assessed by denaturing gradient  
943 gel electrophoresis and high-throughput sequencing. *Aquac. Res.* 47, 857–869.  
944 <https://doi.org/10.1111/are.12545>
- 945 Yang, C., Albright, L., 1992. Effects of the harmful diatom *Chaetoceros concavicornis* on  
946 respiration of rainbow trout *Oncorhynchus mykiss*. *Dis. Aquat. Organ.* 14, 105–114.  
947 <https://doi.org/10.3354/dao014105>
- 948 Zhang, Z., 2021. Research Advances on Tilapia Streptococcosis. *Pathogens* 10, 558.  
949 <https://doi.org/10.3390/pathogens10050558>
- 950 Zhou, J., Ning, D., 2017. Stochastic Community Assembly: Does It Matter in Microbial  
951 Ecology? *Microbiol. Mol. Biol. Rev.* 81. <https://doi.org/10.1128/MMBR.00002-17>
- 952 Zhou, R., Wang, H., Wei, D., Zeng, S., Hou, D., Weng, S., He, J., Huang, Z., 2021. Bacterial  
953 and eukaryotic community interactions might contribute to shrimp culture pond soil  
954 ecosystem at different culture stages. *Soil Ecol. Lett.* <https://doi.org/10.1007/s42832-021-0082-6>
- 955
- 956 Zimba, P. V., Grimm, C.C., 2003. A synoptic survey of musty/muddy odor metabolites and  
957 microcystin toxin occurrence and concentration in southeastern USA channel catfish  
958 (*Ictalurus punctatus* Rafinesque) production ponds. *Aquaculture* 218, 81–87.  
959 [https://doi.org/10.1016/S0044-8486\(02\)00519-7](https://doi.org/10.1016/S0044-8486(02)00519-7)

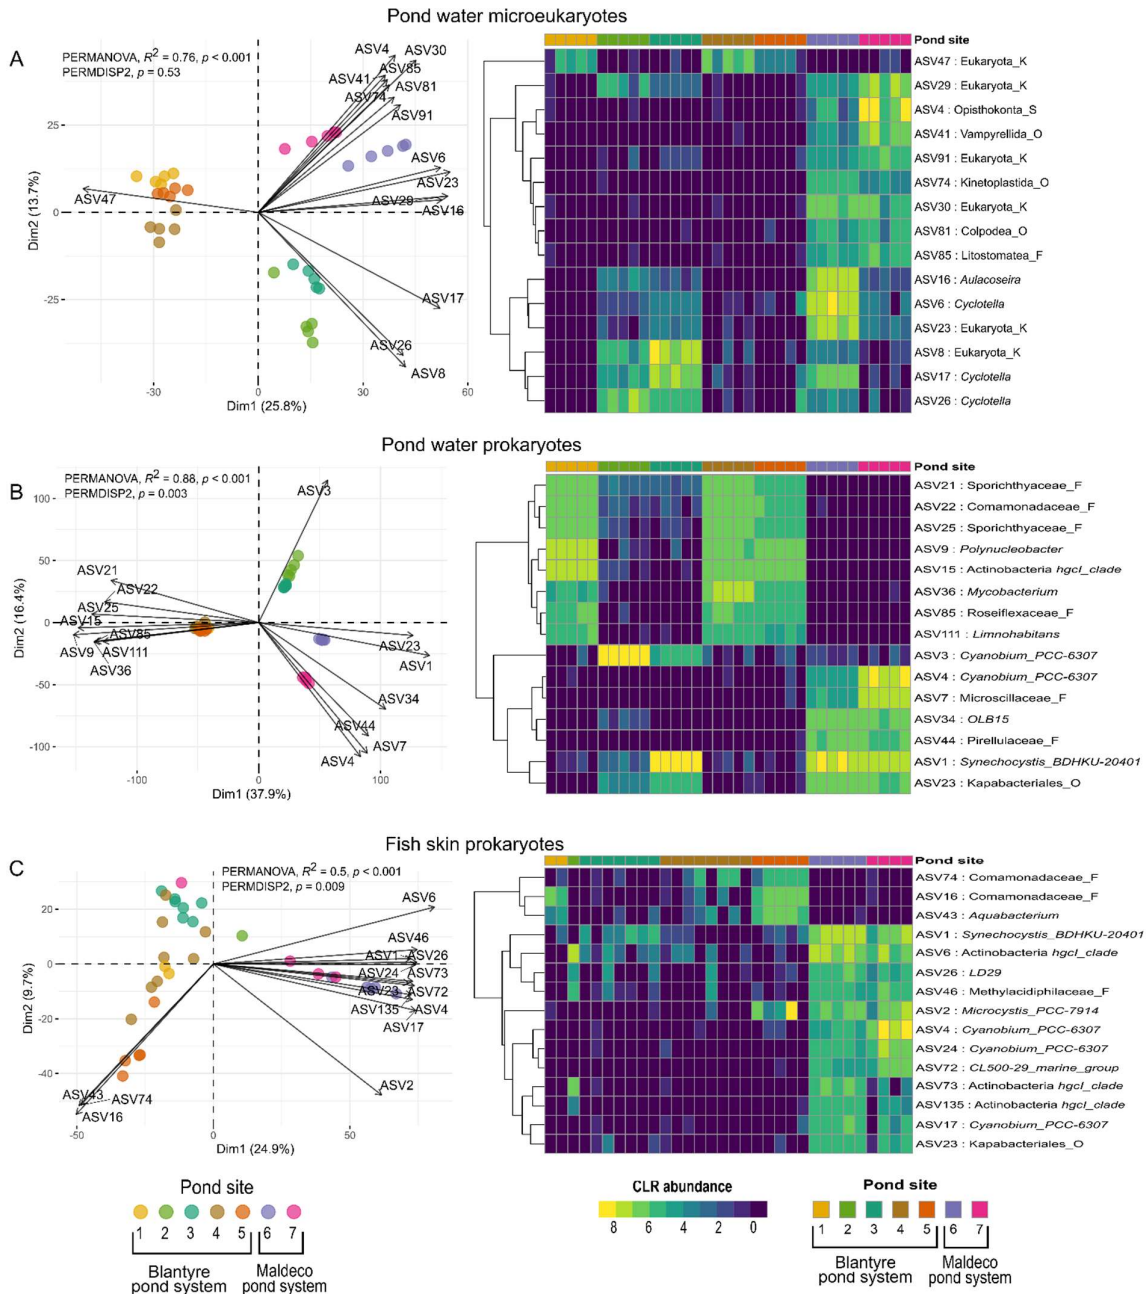

960 **Figure 1: Microbial compositional diversity and abundance of pond water varies significantly by pond site,**  
 961 **with trends for inter-site variation consistent across bacterial and eukaryotic communities. Fish skin**  
 962 **samples show significant dispersion within pond sites. Left panel:** Ordination by PCoA biplots on Euclidean  
 963 **distance of log-ratios (Aitchison distance). Points represent samples, coloured by pond site, with arrows for top**  
 964 **15 Amplicon Sequence Variants (ASV) explaining variation between samples. ASV abundances increase in the**  
 965 **direction of arrows and arrow length represents magnitude of change. Angles between arrows denote correlation**  
 966 **between ASVs (approximately  $0^\circ$  = correlated,  $< 90^\circ$  positive correlation,  $> 90^\circ$  negative correlation,  $90^\circ$  no**  
 967 **correlation).**  
 968 **Right panel:** The centred log-ratio (CLR) abundances of top 15 discriminant ASVs are plotted as accompanying  
 969 **heatmaps, with ASVs ordered according to a hierarchical clustering dendrogram. Labels include ASV number,**  
 970 **lowest available taxonomic classification and rank of this classification e.g. “\_F” = Family.**

971

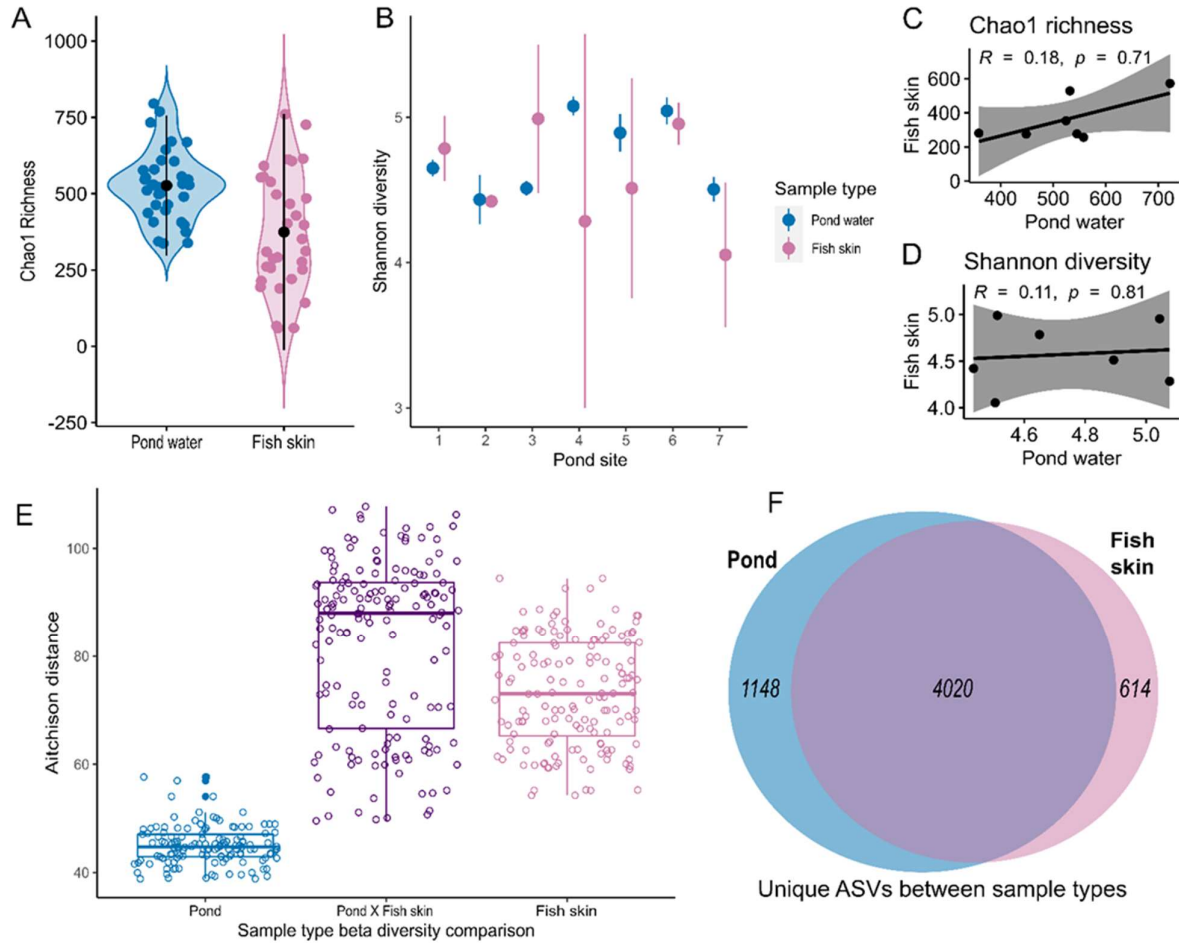

972

973

**Figure 2: Comparisons of prokaryotic richness and diversity between pond water and fish skin.**

974

**A.** Chao1 richness estimates of ASVs per sample, with sample type group means and standard

975

deviations. **B.** Shannon diversity was calculated for each sample and plotted for each pond site as group

976

means and standard deviations. **C, D.** Chao1 richness and Shannon diversity showed no correlation

977

between fish skin and pond water, with points plotted for the mean of each pond site. A regression line

978

of Pearson's correlation coefficient is plotted, with 95% confidence intervals. **E.** Beta diversity pairwise

979

comparisons of Aitchison distance between samples of pond water, pond water vs fish skin and fish

980

skin, within each pond site. **F.** Number of ASVs unique or shared between pond water and fish skin.

981

982

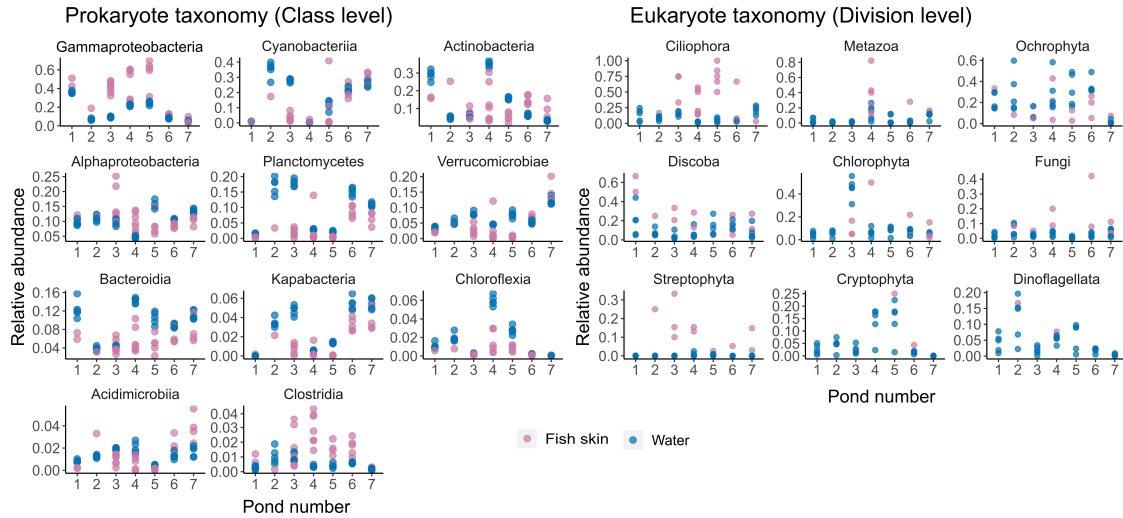

983  
984  
985  
986  
987  
988  
989  
990

**Figure 3: Relative abundance of bacterial (16S) and eukaryotic (18S) taxonomic communities.** Each plot reveals the relative abundance for every sample collected at pond sites 1-7, with faceting at the taxonomic levels class (16S) and division (18S). Fish skin and pond water samples are represented in pink and blue respectively. Each facet is scaled independently.

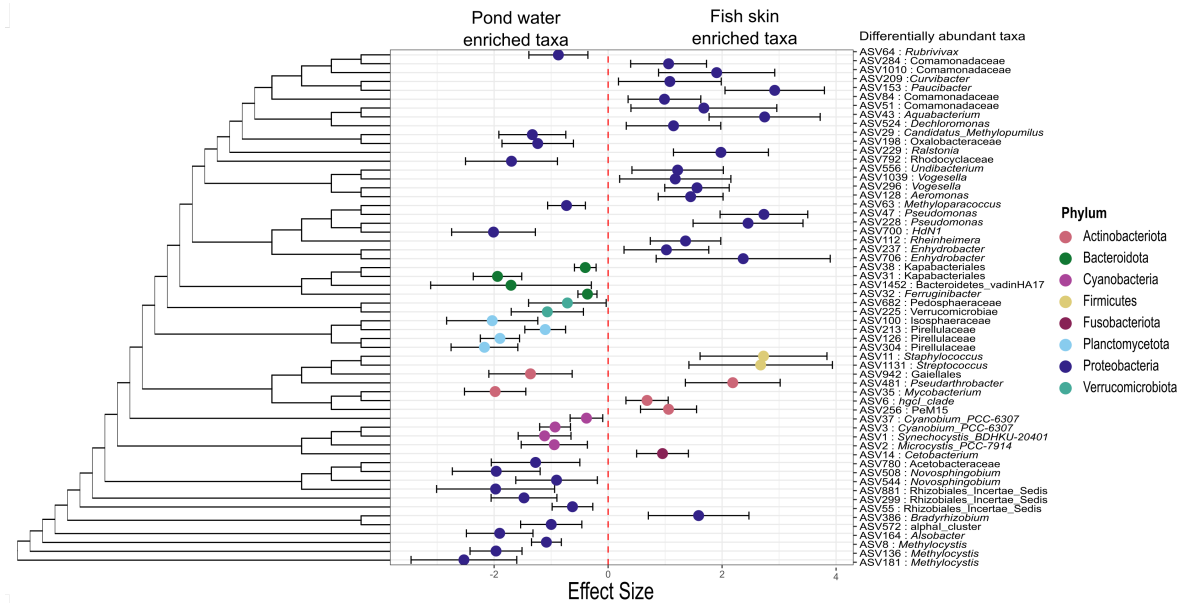

991  
992  
993  
994  
995  
996  
997

**Figure 4: Differentially abundant prokaryotes of pond water and fish skin show phylogenetically conserved trends.** The effect sizes and 95% prediction intervals of significant differential abundant taxa (FDR < 0.05) are plotted. Taxa to the left with a negative effect size are enriched in pond water, while taxa with a positive effect size are enriched in the fish skin. Taxa are ordered according to the phylogenetic tree, with labels included for the highest available taxonomic classification of each ASV.

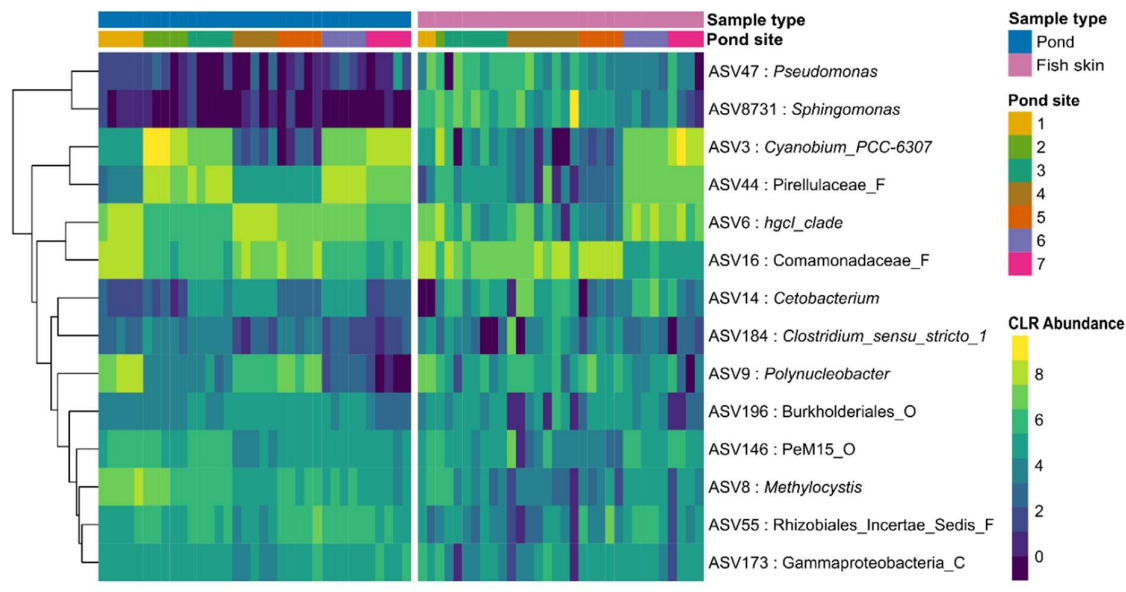

999 **Figure 5: Core bacterial genera of tilapia skin communities.** ASVs were amalgamated at genus level,  
1000 rarefied and core genera were classified across fish samples at an 80% prevalence threshold and 0.01%  
1001 detection threshold. Abundance counts of core genera were transformed and are presented as non-  
1002 rarefied compositional log ratios for both pond water and fish skin samples. Abundances were utilised  
1003 for ordering by a hierarchical clustering dendrogram.
